# Supplementary material for: Identification of Colorectal Cancer Related Genes with mRMR and Shortest Path in Protein-Protein Interaction Network
Source: PLoS One. 2012 Apr 4;7(4):e33393. doi: 10.1371/journal.pone.0033393 (PMC3319543; doi:10.1371/journal.pone.0033393)
Supplement: Supporting Information S1 — The cancer-related gene list and the two colorectal cancer-related gene lists. (XLS) [file pone.0033393.s001.xls]

## Sheet: Sheet1
list1:cancer related gene
list2:colorectal cancer related gene list from Sabates-Bellver et al.
list3:colorectal cancer related gene list from Nagaraj et al.
list1	list2	list3
ABCA1	TCN1	MEF2C
ABCA3	CDH3	WWTR1
ABCB10	REG1B	SPIB
ABCB11	KLK10	GUCA2B
ABCB6	MMP7	PYY
ABCB8	KIAA1199	TFAP2C
ABI1	MMP3	PAPPA
ABL1	NLF1	FXYD1
ABL2	DPEP1	IGFBP5
ABP1	REG3A	CHGA
ACADM	DUSP27	MEIS1
ACIN1	SLCO1B3	THBS2
ACSL3	LOC254057	ADAMTS1
ACSL5	DEFA6	LTF
ACSL6	FOXQ1	C1S
ACVR1B	MSX2	CCL13
ADAM12	TACSTD2	CCL2
ADAM19	UNQ2541	CCL8
ADAMTS18	FABP6	CHGB
ADAMTS19	ASCL2	COL15A1
ADAMTSL3	S100A2	CTGF
AFF1	CLDN2	ENAM
AFF3	IL8	SERPING1
AFF4	LOC643911	GAD1
AIM1	SERPINB5	EPHB3
AKAP12	MMP1	BMX
AKAP6	KRT6B	COL5A1
AKAP9	CHI3L1	FGF9
AKT1	RPESP	HES6
AKT2	LY6G6D	CXCL12
ALK	L1TD1	SERPINA3
ALS2CL	DUOXA2	C4BPB
AMFR	ABHD7	REG1A
APC	LOC283859	PLAU
AR	CXCL11	CCL11
ARFGAP3	MMP10	AZGP1
ARFGEF2	CYP4X1	GCG
ARHGAP25	DEFA5	SERPINE1
ARHGAP26	APIN	GUCA2A
ARHGEF1	CLDN1	ITPR1
ARHGEF10	WDR72	MEP1A
ARHGEF12	MSX1	ST3GAL1
ARHGEF4	C9orf26	IL6
ARID1B	IRX3	PI15
ARL11	GABRP	SPP1
ARNT	REG1A	COL5A2
ASL	HYAL1	CXCL5
ASPSCR1	GRHL3	MMP1
ASXL1	LPL	PCOLCE
ATF1	LOC144501	SELE
ATIC	PTP4A3	S100A9
ATM	FAIM2	SLC4A4
ATN1	TRIM29	REG3A
ATP11A	CPS1	CDH2
ATP13A1	DUSP4	DUSP1
ATP13A5	KLK11	PCDH7
ATP8B1	DSG3	PPP1R14A
ATRN	AXIN2	SNAP25
AURKA	DSC3	THBS1
AXIN2	APCDD1	BTK
BARD1	DLGAP1	LATS2
BAT2	MUC5AC	PRKAA2
BAT3	SRPX2	CCL21
BAX	PSAT1	CD52
BCAR1	CST1	ASPN
BCL10	DUOX2	DCN
BCL11A	ART3	LOX
BCL11B	REG4	LUM
BCL2	KRT23	SERPINF1
BCL3	CXCL3	SLIT2
BCL6	CXCL1	SPARC
BCL7A	CADPS	TFPI
BCL9	SERPINA3	SLCO4A1
BCORL1	PHLDA1	EDN3
BCR	DSG4	APOA2
BGN	GIF	CXCL11
BIRC3	LGR5	GDF15
BLM	SLC6A6	SOX2
BMP1	LCN2	VNN1
BMPR1A	GALNT6	ZIC2
BOC	ACSL6	COL4A1
BRAF	RTEL1	CXCL1
BRCA1	PCSK1	GAL
BRCA2	RPL22L1	IL8
BRD3	ETV4	LCN2
BRD4	LRRC34	MFAP2
BRIP1	IL13RA2	MMP7
BTG1	LRRC36	OSM
BUB1	ARNTL2	PPBP
BUB1B	QPCT	SEMG1
C10orf137	TRIM7	VWF
C10orf72	TEAD4	CXCL10
C15orf21	SLC22A3	CXCL9
C1QB	UGT1A6	PTGDS
C1orf2	TGFBI	DPEP1
C7orf11	SP5	KRT7
CAD	NOTUM	TPH1
CANT1	SLC16A4	CA4
CARS	CXCL2	MME
CASC5	C4BPB	NOTCH3
CASP10	IGFBP2	AICDA
CBFA2T3	TNS4	CEL
CBFB	STC1	BCHE
CBL	GRM8	C3
CBLB	TDGF1	C5AR1
CBLC	MSLN	CALCRL
CCDC6	NMU	CALD1
CCNB1IP1	HES6	CDH5
CCND1	AZGP1	CFH
CCND2	TBX3	CLEC3B
CCND3	CHAC1	CLIC4
CCNE1	TNFRSF6B	CNN1
CD109	S100P	CRIP2
CD2	PF4	ENTPD2
CD248	JUB	EPB41L3
CD74	RRM2	FABP4
CDC73	RNF183	GHR
CDH1	CD44	GJA1
CDH10	AP1S3	IGHD
CDH11	SLC7A5	ITGA4
CDH6	NFE2L3	KLKB1
CDK2	MGC11082	MS4A1
CDK4	SH3TC2	PALM
CDK6	NQO1	PECAM1
CDKN1A	CCL20	PMP22
CDKN2A	UCA1	PRNP
CDON	S100A8	RASGRP3
CDX2	GRHL1	RDX
CEBPA	DMBT1	RFTN1
CHCHD7	FREM2	RGS4
CHEK2	UNG2	SCNN1G
CHIC2	GPSM2	Septin-9
CHL1	TNFRSF10C	TAGLN
CHN1	S100A11	TDO2
CIC	ANLN
CIITA	ALDH4A1
CLCN3	VSNL1
CLSTN3	DGAT2
CLTC	SLC6A14
CNKSR2	PYY
CNNM4	GCG
CNTN1	SST
CNTN3	INSL5
CNTN4	GUCA2B
COL11A1	AQP8
COL1A1	C4orf7
COL1A2	CXCL13
COL3A1	TPH1
COL4A6	SLC30A10
COL7A1	GUCA1B
COX6C	CHGA
CPAMD8	TRPM6
CPS1	CLDN8
CREB1	ANGPTL1
CREB3L2	ABCA8
CREBBP	VMD2L2
CRTC3	CD177
CSF1	GCNT2
CSF3	MS4A12
CSMD3	OGN
CSPP1	ABCG2
CTNNB1	CA1
CTNND2	CRYBA2
CYLD	CCL23
CYP2A6	CCL21
DAZAP1	MS4A1
DBN1	ADH1B
DCHS1	GREM2
DDB2	ALPI
DDIT3	CR2
DDX10	FAM5C
DDX5	CCL19
DDX6	CA4
DEK	OSTalpha
DICER1	SCGN
DLC1	PCK1
DMD	C21orf88
DNASE1L3	ECRG4
DPAGT1	VIP
DPP10	MFAP5
DPYD	GBA3
DSCAML1	BCHE
DTNB	B3GALT5
DVL3	FEV
ECT2	CA7
EDA	CDKN2B
EFS	PLP1
EGFL6	SPIB
EGFR	SCNN1B
EHBP1	INSM1
EHMT1	SLC6A19
EIF4A2	CHGB
EIF4E	ADAMDEC1
EIF4G1	MSTP9
EIF5	DPT
ELAC2	SLC26A3
ELF4	GPM6B
ELK4	CXCL12
ELL	HSD3B2
ELN	SCG2
EML4	SLC25A34
EN1	EDN3
EP300	MFAP4
EPHA3	CLCA4
EPHA4	NEUROD1
EPHA7	CHRDL1
EPHB2	SLC4A4
EPHB6	SORBS2
EPS15	NAALADL1
ERBB2	MAMDC2
ERCC3	FABP4
ERCC4	ANK2
ERCC5	CPB1
ERCC6	EPHA3
EREG	CHAD
ERF	MT1K
ERG	CP
ETS1	PTPRR
ETV1	GLDN
ETV4	CDH19
ETV5	CEACAM7
ETV6	RSPO3
EVL	FBLN1
EWSR1	LIFR
EXT1	CLDN23
EXT2	ANPEP
F8	GDPD2
FANCA	LGALS2
FANCC	RBM24
FANCD2	MYOT
FANCE	SFRP1
FANCF	CMAH
FANCG	FXYD1
FARP1	F13A1
FAS	UGT2B15
FASLG	UNC5C
FBN2	LRRN5
FBXW7	TM6SF2
FCGR2B	OSTbeta
FCRL4	MEIS1
FGFR1	NRXN1
FGFR1OP	KIF5C
FGFR2	LOC63928
FGFR3	MGC33530
FGFR4	SLC17A4
FH	FCRLM1
FHIT	IGHG1
FHOD1	CA2
FIGN	PCDH19
FIP1L1	ASPN
FLCN	CNN1
FLI1	LOC646627
FLJ10404	PDZK1
FLNA	SI
FLNB	CYP3A4
FLNC	MFSD4
FLT4	SLC26A2
FN1	LOC389023
FNBP1	PLAC9
FNDC3B	SCN9A
FOXP1	MYH11
FREM1	TEX11
FSTL3	XKR4
FUS	CD37
G3BP2	SEMA6D
GAB1	ATP1A2
GALNS	KIAA1913
GALNT5	MGC13057
GAS7	HPGD
GATA2	LOC25845
GGA1	PHLPPL
GGA3	SCNN1G
GLI3	COL14A1
GMPS	NLGN4X
GNAQ	AFF3
GNAS	BRDG1
GOLGA5	NR3C1
GOLGB1	PNLIPRP2
GOPC	SCARA5
GPC3	SIGLEC1
GPHN	CFH
GPNMB	CRTL1
GRB2	RNF152
GRID1	TTR
GRIN2D	XLKD1
GRM1	CDKL1
GSN	KIAA2022
GSTP1	HRASLS2
HAPLN1	TP53INP2
HAS2	CPM
HDAC4	HAPLN1
HDLBP	MEP1B
HERPUD1	TM4SF2
HIP1	ZG16
HIVEP3	NR5A2
HLF	PLA2G12B
HMGA1	TNXB
HMGA2	AMPD1
HNRNPA2B1	CPNE8
HOOK1	PDE3A
HOOK3	EDIL3
HOXA11	OR51E2
HOXA13	SPINK5
HOXA3	ASPA
HOXA9	CCL8
HOXD11	FAIM3
HOXD13	XPNPEP2
HOXD4	FAM107A
HRAS	GHR
IDH1	BMP3
IDH2	DPP10
IGFBP3	SYNPO2
IGSF22	ABI3BP
IGSF9	GPC6
IKZF1	THRB
IL1B	C14orf139
IL1RN	MYLK
IL21R	PKIB
IL6ST	LOC399959
IL7R	HSD17B2
ING1	MUCDHL
INHBE	SECTM1
IRF1	ZNF483
IRF4	NEDD4L
IRS2	CHODL
IRS4	PI15
ISLR	EPHA7
ITGA9	RAB3B
ITGAE	WASF3
ITGB2	LRRK2
ITGB3	MST1
ITK	PAG1
JAK2	TRAF3IP3
JAK3	KNG
JARID1B	LOC134285
JAZF1	ARHGAP15
JUP	MGC4172
KCNQ5	FLRT2
KDR	GFRA3
KEAP1	PCDH9
KIAA0182	ZFHX1B
KIAA0427	IL6R
KIAA0467	EPB41L3
KIAA0556	LOC285878
KIAA0664	NAP1L2
KIAA0999	SPINK2
KIAA1549	CYTL1
KIAA1618	CCL5
KIAA1632	CLEC3B
KIAA2022	DUSP1
KIAA2099	EDG2
KIF14	KIAA0523
KIT	NPY
KLF5	ITIH5
KLF6	CNNM2
KLK2	MEOX2
KPNA5	TNS1
KRAS	TUSC3
KTN1	DARC
LAMA1	HOXD10
LAMA2	PDE6A
LAMA4	SLC15A1
LAMB3	UGT2B17
LAMC1	SLC22A4
LASP1	TMEM140
LCK	RERG
LCP1	TMEM100
LGR6	LAMA1
LHFP	BMP5
LHX4	NDN
LIFR	ADCY2
LIG1	DOCK10
LIG3	EFEMP1
LMO2	ENPP6
LMO7	GPNMB
LPP	RPIB9
LRBA	FBXL7
LRP1	OIT3
LRP2	PPY
LRRC7	C7
LRRFIP1	SORCS1
LYL1	USP2
LZTS1	MS4A8B
MACF1	C18orf4
MAD1L1	FCRH3
MAF	PTN
MAFB	SV2B
MAGEE1	TNFRSF17
MALT1	LOC284262
MAML2	TBC1D9
MAP1B	NAP1L3
MAP2	TRGV9
MAP2K1	VPREB3
MAP2K4	SIT
MAP2K7	COLEC12
MAP3K6	CTSG
MAPK8IP2	AOC3
MAPKBP1	CES2
MC1R	FAM70A
MCC	RFXDC1
MCF2L2	PDZD3
MCM3AP	KCNIP4
MDM2	PRIMA1
MDM4	RTN1
MDS2	AKAP12
MEN1	CDA
MET	L1CAM
MICAL1	RSPO2
MINPP1	TLR7
MITF	CERKL
MKL1	IGHM
MLF1	MGC9913
MLH1	ATP5J
MLH3	KCTD12
MLL	SOX10
MLL3	FMN2
MLLT1	ST7L
MLLT10	CLU
MLLT11	BTNL8
MLLT3	CNTN4
MLLT4	FAM13C1
MLLT6	FN1
MMP11	GPX3
MMP15	PRKCB1
MMP2	CD36
MN1	OSR1
MRE11A	RHOH
MSH2	TRA@
MSH6	CD48
MSI2	CHRNA1
MSN	TMOD2
MSR1	LMOD1
MTCP1	LOC572558
MTMR3	NCF1
MUC1	C1orf165
MUTYH	IGF1
MXI1	MCOLN2
MYB	CCL13
MYC
MYCL1
MYCN
MYH11
MYH9
MYO1G
MYO5C
MYST3
MYST4
N4BP2
NACA
NAV3
NBN
NCKIPSD
NCOA1
NCOA2
NCOA4
NCOA6
NET1
NF1
NF2
NFATC1
NFKB2
NHS
NID2
NIN
NONO
NOS3
NOTCH1
NOTCH2
NPM1
NR3C2
NR4A3
NRAS
NRCAM
NRG1
NSD1
NTRK3
NUMA1
NUP133
NUP210
NUP214
NUP98
OBSCN
ODC1
OGG1
OLIG2
OR51E1
OSBP
OSBPL11
P2RY14
PAFAH1B2
PALB2
PALLD
PAX8
PBX1
PCDH11X
PCDHA9
PCDHB15
PCM1
PCSK7
PDCD11
PDE4DIP
PDGFB
PDGFRA
PDGFRB
PDGFRL
PER1
PER2
PHB
PHC1
PHIP
PICALM
PIK3CA
PIK3CB
PIK3R1
PIK3R4
PIM1
PKHD1
PKNOX1
PLA2G2A
PLAG1
PLB1
PLCB1
PLCG1
PLCG2
PLD2
PLEKHA8
PLS3
PLXNB1
PML
PMS1
POT1
POU2AF1
PPARG
PPM1E
PPP2CB
PPP2R1B
PRCC
PRDM16
PRF1
PRIMA1
PRKAR1A
PRKD1
PROS1
PRPF4B
PRPS1
PRRX1
PRSS7
PSIP1
PTEN
PTPN11
PTPN12
PTPN14
PTPRC
PTPRD
PTPRJ
PTPRS
PTPRU
RABEP1
RAD51
RAD51L1
RAD54B
RAD54L
RAF1
RALGDS
RANBP17
RANBP2
RAP1GDS1
RAPH1
RARA
RASAL2
RASGRF2
RB1
RB1CC1
RBBP8
RBM15
RECQL4
REL
RET
RFX2
RGL1
RHOD
RHOH
RIF1
RIMS2
RNASEL
RNF139
RNF6
ROBO1
ROS1
RPGRIP1
RPL22
RPN1
RPS10
RPS6KA1
RPS6KA2
RPS6KA3
RRAS2
RUNX1
RUNX1T1
SBNO1
SCARF2
SCNN1B
SDHB
SDHC
SDHD
SEMA4G
SEPHS2
2011-09-06
2011-09-09
SERPINB1
SET
SETBP1
SETD2
SF3A1
SFPQ
SFRS3
SFRS6
SH3GL1
SH3TC1
SIGLEC7
SIL
SIX4
SLC22A15
SLC22A18
SLC29A1
SLC45A3
SLC9A2
SMAD2
SMAD3
SMAD4
SMARCA4
SMARCB1
SMO
SMTN
SOCS1
SORBS1
SORL1
SP110
SPAG6
SPEN
SPTAN1
SPTBN2
SRC
SS18
SS18L1
STAB1
STARD8
STK11
SUFU
SULF2
SUZ12
SYK
SYNE1
SYNE2
SYNPO
TACC2
TAF1
TAF15
TAF2
TAL1
TAX1BP1
TBX1
TCEA1
TCF12
TCF3
TCF7L1
TCF7L2
TCL1A
TCOF1
TCTA
TEK
TERF1
TERF2
TERT
TESK1
TET2
TFE3
TFEB
TFG
TFPT
TFRC
TG
TGFBR1
TGFBR2
TGM3
THBS3
THRAP3
TIAM1
TIMELESS
TLL1
TLN1
TLR2
TLR9
TMEM123
TMPRSS2
TMPRSS3
TNFRSF10B
TNFRSF17
TNFRSF25
TNFRSF9
TNN
TOP1
TP53
TPM3
TPM4
TPR
TRIM24
TRIM27
TRIM33
TRIM36
TRIOBP
TRIP11
TSC1
TSC2
TSG101
TSHR
TTL
TTLL3
UHRF2
UQCRC2
USP6
VAV3
VEPH1
VHL
WAS
WHSC1
WHSC1L1
WRN
WT1
WWOX
XDH
XPA
XPC
XRCC3
ZBTB3
ZFP64
ZFYVE26
ZNF318
ZNF331
ZNF384
ZNF521
ZNF569
