# Supplementary material for: Identification of Colorectal Cancer Related Genes with mRMR and Shortest Path in Protein-Protein Interaction Network
Source: PLoS One. 2012 Apr 4;7(4):e33393. doi: 10.1371/journal.pone.0033393 (PMC3319543; doi:10.1371/journal.pone.0033393)
Supplement: Supporting Information S2 — The MaxRel features table and mRMR features table. (XLS) [file pone.0033393.s002.xls]

## Sheet: MaxRel features
Order	Feature	probes	Symbol	Score
1	9440	ILMN_1735578	GUCA2B	0.579
2	11545	ILMN_1755796	BEST2	0.563
3	13159	ILMN_1771467	TMIGD	0.541
4	18119	ILMN_2072568	CLDN8	0.535
5	12623	ILMN_1766264	PI16	0.533
6	10050	ILMN_1740917	SCNN1B	0.494
7	3294	ILMN_1679176	CLCA4	0.485
8	17167	ILMN_1811598	ADH1B	0.48
9	169	ILMN_1652431	CA1	0.474
10	5115	ILMN_1695157	CA4	0.469
11	11052	ILMN_1751062	SCARA5	0.469
12	8687	ILMN_1728107	GNG7	0.466
13	23622	ILMN_2384536	PECI	0.464
14	20507	ILMN_2210934	NR3C2	0.464
15	20016	ILMN_2184373	IL8	0.462
16	19713	ILMN_2167758	CILP	0.457
17	2321	ILMN_1670672	TMEM37	0.447
18	21573	ILMN_2283772	LOC253012	0.447
19	6384	ILMN_1706635	ELA2	0.447
20	3637	ILMN_1682176	CLEC3B	0.447
21	17255	ILMN_1812461	WISP2	0.443
22	15624	ILMN_1796685	VMD2L2	0.443
23	7567	ILMN_1717599	CNTN3	0.443
24	1309	ILMN_1661799	LOC643940	0.443
25	5989	ILMN_1703075	PYY	0.443
26	13530	ILMN_1775235	AFF3	0.443
27	3130	ILMN_1677765	LRP8	0.443
28	13254	ILMN_1772521	MTHFD1L	0.44
29	7111	ILMN_1713462	AQP8	0.437
30	16785	ILMN_1808157	RPIB9	0.43
31	3254	ILMN_1678816	GREM2	0.43
32	15088	ILMN_1791302	EFHC2	0.425
33	754	ILMN_1657435	MT1M	0.425
34	21928	ILMN_2304404	MAWBP	0.425
35	7338	ILMN_1715583	BOP1	0.425
36	19956	ILMN_2181064	GBA3	0.425
37	8287	ILMN_1724396	GCG	0.425
38	19312	ILMN_2143314	SPIB	0.425
39	12417	ILMN_1764380	GLTP	0.423
40	14936	ILMN_1789648	SCGN	0.42
41	8576	ILMN_1727150	DHRS9	0.415
42	14425	ILMN_1784447	PLCE1	0.415
43	8827	ILMN_1729450	MGC16824	0.415
44	20838	ILMN_2230016	HIGD1A	0.415
45	8841	ILMN_1729563	UGDH	0.415
46	15432	ILMN_1794875	HMFN0839	0.413
47	5778	ILMN_1701441	EDG2	0.413
48	19879	ILMN_2176592	BCHE	0.41
49	16795	ILMN_1808245	RPESP	0.41
50	4220	ILMN_1687275	JUB	0.408
51	18383	ILMN_2089752	LOC285016	0.408
52	12928	ILMN_1769394	PLCD1	0.408
53	1797	ILMN_1666109	MB	0.408
54	3032	ILMN_1676899	YEATS2	0.408
55	655	ILMN_1656540	RUVBL1	0.408
56	15453	ILMN_1795104	ACADS	0.408
57	23777	ILMN_2390310	MGC14376	0.408
58	613	ILMN_1656285	METTL7A	0.408
59	12361	ILMN_1763749	GUCA2A	0.408
60	1424	ILMN_1662886	RP11-450P7.3	0.408
61	4292	ILMN_1687848	C7	0.407
62	14715	ILMN_1787526	MGC13057	0.404
63	3739	ILMN_1683063	PDE9A	0.404
64	13546	ILMN_1775380	SMOX	0.404
65	10155	ILMN_1741942	STX16	0.404
66	6648	ILMN_1709044	TGIF2	0.404
67	12062	ILMN_1761044	GNB1L	0.404
68	18647	ILMN_2104356	COL1A2	0.404
69	22505	ILMN_2339192	HMGCLL1	0.404
70	7878	ILMN_1720501	ABCA9	0.404
71	13079	ILMN_1770682	TEP1	0.404
72	7050	ILMN_1712786	KIAA0828	0.404
73	7861	ILMN_1720373	SLC7A5	0.404
74	636	ILMN_1656395	MYOT	0.401
75	13423	ILMN_1774207	ANGPT2	0.4
76	2165	ILMN_1669410	CHGA	0.4
77	1241	ILMN_1661309	XKR4	0.398
78	14969	ILMN_1790098	OGN	0.398
79	24522	ILMN_2415911	COVA1	0.392
80	10324	ILMN_1743445	FAM107A	0.392
81	10650	ILMN_1746888	PCOLCE2	0.392
82	21988	ILMN_2309848	FXYD5	0.392
83	23306	ILMN_2373062	RHBDF2	0.392
84	16725	ILMN_1807493	ACVRL1	0.392
85	23747	ILMN_2389155	UGP2	0.392
86	5163	ILMN_1695631	LOC63928	0.39
87	20505	ILMN_2210753	XLKD1	0.39
88	24099	ILMN_2401822	FTSJ1	0.386
89	9039	ILMN_1731397	STMN4	0.386
90	7767	ILMN_1719351	TCF21	0.386
91	19438	ILMN_2150586	ZNF536	0.386
92	21842	ILMN_2297710	PLEKHB2	0.386
93	13717	ILMN_1777190	CFD	0.386
94	18928	ILMN_2120695	TSPAN7	0.386
95	5795	ILMN_1701551	ABCA6	0.386
96	16672	ILMN_1806951	CSTF3	0.386
97	7817	ILMN_1719906	HADHSC	0.386
98	8162	ILMN_1723158	NOL1	0.386
99	20439	ILMN_2206746	BGN	0.386
100	13439	ILMN_1774330	KIAA0523	0.386
101	12032	ILMN_1760718	DKFZp761I2123	0.386
102	12138	ILMN_1761789	CA7	0.386
103	4429	ILMN_1689001	CDK4	0.385
104	16443	ILMN_1804737	RAVER2	0.385
105	14623	ILMN_1786396	ZZEF1	0.385
106	12279	ILMN_1763127	CCBP2	0.385
107	19439	ILMN_2150654	ZSWIM4	0.385
108	14998	ILMN_1790518	PHF16	0.385
109	11043	ILMN_1750969	C9orf10OS	0.385
110	22421	ILMN_2334693	NARF	0.385
111	16377	ILMN_1803997	SDCCAG3	0.385
112	17393	ILMN_1813704	KIAA1199	0.385
113	19811	ILMN_2173611	MT1E	0.385
114	9054	ILMN_1731529	MS4A12	0.381
115	8206	ILMN_1723678	PRPH	0.379
116	22600	ILMN_2343278	PPAP2A	0.379
117	23676	ILMN_2387105	OGN	0.379
118	20733	ILMN_2224907	C4orf34	0.376
119	1431	ILMN_1662935	C1QTNF7	0.376
120	12558	ILMN_1765620	MGC33530	0.376
121	10704	ILMN_1747506	DHX34	0.376
122	1590	ILMN_1664294	LEPRE1	0.376
123	13732	ILMN_1777325	STAT1	0.376
124	10772	ILMN_1748241	RP11-19J3.3	0.376
125	6129	ILMN_1704294	CDH3	0.373
126	19403	ILMN_2149164	SFRP1	0.369
127	4676	ILMN_1691290	CELSR3	0.369
128	14151	ILMN_1781514	PCDH17	0.369
129	20109	ILMN_2189675	LOC646962	0.369
130	1355	ILMN_1662198	RANGAP1	0.369
131	1138	ILMN_1660426	CPSF4	0.369
132	9246	ILMN_1733627	NEDD4L	0.369
133	51	ILMN_1651506	NCOA6IP	0.369
134	23613	ILMN_2384181	DHRS9	0.369
135	440	ILMN_1654861	ACO2	0.369
136	301	ILMN_1653529	TEX10	0.369
137	12451	ILMN_1764769	LOH11CR2A	0.369
138	6683	ILMN_1709399	SLC25A34	0.369
139	12691	ILMN_1767111	TMEM16K	0.369
140	3296	ILMN_1679194	UGT2B7	0.369
141	6933	ILMN_1711807	LPHN3	0.369
142	14271	ILMN_1782761	ARHGAP20	0.369
143	19231	ILMN_2137789	KLF4	0.369
144	14922	ILMN_1789535	DHDDS	0.369
145	6034	ILMN_1703433	PLSCR3	0.369
146	11523	ILMN_1755620	IER5L	0.369
147	16061	ILMN_1801090	KA21	0.369
148	6459	ILMN_1707310	MGLL	0.369
149	8790	ILMN_1729117	COL5A2	0.369
150	3209	ILMN_1678478	CHST5	0.368
151	15604	ILMN_1796490	GRINA	0.366
152	12291	ILMN_1763228	MEF2D	0.366
153	4825	ILMN_1692623	LOC653950	0.366
154	16274	ILMN_1803110	SF3B3	0.366
155	22459	ILMN_2336781	SOD2	0.366
156	24128	ILMN_2402581	Gcom1	0.366
157	12077	ILMN_1761131	PECI	0.366
158	20893	ILMN_2232854	FAP	0.366
159	15139	ILMN_1791759	CXCL10	0.366
160	17363	ILMN_1813517	DISP2	0.366
161	16949	ILMN_1809662	LOC440145	0.366
162	21060	ILMN_2246956	BCL2	0.366
163	10821	ILMN_1748770	CKAP5	0.366
164	6127	ILMN_1704286	FXYD5	0.366
165	18347	ILMN_2087528	CPSF3	0.366
166	6418	ILMN_1706859	LOC91689	0.366
167	23411	ILMN_2376859	PDGFD	0.366
168	20176	ILMN_2193315	C14orf143	0.366
169	9786	ILMN_1738681	NUP62	0.366
170	24351	ILMN_2410406	AKAP7	0.366
171	20257	ILMN_2197381	PCK1	0.366
172	371	ILMN_1654287	ADCY9	0.366
173	23469	ILMN_2379469	EIF3S9	0.366
174	18289	ILMN_2083567	PHLPPL	0.366
175	5376	ILMN_1697544	SLC25A29	0.366
176	1539	ILMN_1663866	TGFBI	0.366
177	4312	ILMN_1687978	PHLDA1	0.366
178	8028	ILMN_1721989	ATP5F1	0.366
179	5894	ILMN_1702363	SULF1	0.366
180	14974	ILMN_1790136	C20orf20	0.366
181	20652	ILMN_2219867	KRT20	0.366
182	19770	ILMN_2171023	LGI1	0.366
183	13825	ILMN_1778238	C17orf40	0.366
184	17862	ILMN_2055760	KIAA1715	0.366
185	4733	ILMN_1691736	ST6GALNAC6	0.366
186	11736	ILMN_1757627	ZMYND19	0.366
187	13738	ILMN_1777397	MSX1	0.366
188	4100	ILMN_1686082	C14orf79	0.366
189	8645	ILMN_1727740	SYNCRIP	0.366
190	4751	ILMN_1691884	STC2	0.366
191	7569	ILMN_1717639	SNF1LK	0.365
192	17584	ILMN_1815745	SOX4	0.364
193	2114	ILMN_1669046	FOXQ1	0.364
194	3022	ILMN_1676822	ECRG4	0.362
195	3428	ILMN_1680251	SORCS1	0.361
196	11356	ILMN_1753830	ETV4	0.361
197	22355	ILMN_2331010	TNFRSF10B	0.361
198	23652	ILMN_2386040	MYOHD1	0.361
199	19479	ILMN_2152502	MGC72080	0.361
200	4809	ILMN_1692413	NMNAT1	0.361
201	4026	ILMN_1685433	COL8A1	0.361
202	7549	ILMN_1717381	HOXD1	0.354
203	11232	ILMN_1752728	FUCA1	0.354
204	9598	ILMN_1737076	HHLA2	0.354
205	17366	ILMN_1813561	SCIN	0.354
206	9871	ILMN_1739397	GLMN	0.353
207	9842	ILMN_1739161	PPAP2A	0.353
208	18183	ILMN_2076429	GALNT17	0.353
209	10022	ILMN_1740706	PMP2	0.353
210	18725	ILMN_2109197	EPB41L3	0.353
211	13353	ILMN_1773395	RDH5	0.353
212	9297	ILMN_1733998	DHRS9	0.353
213	4707	ILMN_1691487	TRAF2	0.353
214	8249	ILMN_1724145	CBX4	0.353
215	5487	ILMN_1698533	IDH3A	0.353
216	15562	ILMN_1796094	CD36	0.353
217	17953	ILMN_2061537	UGT1A8	0.353
218	8318	ILMN_1724686	CLDN1	0.353
219	21279	ILMN_2263466	ACADVL	0.353
220	3385	ILMN_1679949	SLC25A23	0.353
221	14427	ILMN_1784459	MMP3	0.353
222	10502	ILMN_1745420	PHF19	0.353
223	2395	ILMN_1671191	UQCRC1	0.353
224	24122	ILMN_2402392	COL8A1	0.353
225	12649	ILMN_1766613	ZNF121	0.353
226	22939	ILMN_2358886	EDN3	0.352
227	6008	ILMN_1703205	EDN3	0.352
228	20158	ILMN_2192072	MMP7	0.348
229	5291	ILMN_1696657	LRRN5	0.348
230	17665	ILMN_2044832	NOL5A	0.348
231	9310	ILMN_1734229	SPPL2A	0.348
232	22677	ILMN_2347349	CCNB1IP1	0.348
233	18255	ILMN_2081335	C7orf44	0.348
234	24169	ILMN_2404135	RIOK3	0.348
235	2800	ILMN_1674934	FOXF2	0.348
236	11866	ILMN_1758939	RIPK2	0.348
237	21347	ILMN_2269136	CENTG3	0.348
238	19119	ILMN_2131293	LOC200810	0.348
239	5502	ILMN_1698685	MATN2	0.348
240	16027	ILMN_1800654	MCM7	0.348
241	15109	ILMN_1791508	MMP28	0.348
242	19833	ILMN_2174437	CIDEC	0.348
243	21878	ILMN_2298988	ENTPD8	0.348
244	19689	ILMN_2166457	HPGD	0.348
245	14284	ILMN_1782897	GPIAP1	0.348
246	20569	ILMN_2214910	EPHB4	0.348
247	6666	ILMN_1709237	EPHX2	0.348
248	22215	ILMN_2323801	MOCS1	0.348
249	21609	ILMN_2285568	ASAHL	0.348
250	12370	ILMN_1763842	PTRH1	0.348
251	23508	ILMN_2380850	SDCCAG3	0.348
252	15351	ILMN_1794074	MXI1	0.348
253	13675	ILMN_1776679	TAZ	0.348
254	15265	ILMN_1793033	RBM28	0.348
255	10247	ILMN_1742788	PKD1L2	0.348
256	12447	ILMN_1764729	JAG2	0.348
257	1734	ILMN_1665559	CDK2	0.348
258	4282	ILMN_1687768	NCOA7	0.348
259	18218	ILMN_2078592	C6orf105	0.347
260	2498	ILMN_1672148	AKR1B10	0.347
261	19952	ILMN_2180885	FLJ21511	0.347
262	10212	ILMN_1742444	UGT2B10	0.347
263	1152	ILMN_1660552	BMP5	0.347
264	15470	ILMN_1795257	GPT	0.347
265	16797	ILMN_1808258	HTR4	0.347
266	14868	ILMN_1789096	OSTalpha	0.347
267	18870	ILMN_2117508	CTHRC1	0.346
268	9071	ILMN_1731688	KLB	0.346
269	2298	ILMN_1670490	PDPN	0.346
270	17291	ILMN_1812824	SST	0.346
271	12547	ILMN_1765557	OLFML2B	0.346
272	17566	ILMN_1815639	PERQ1	0.346
273	5746	ILMN_1701131	MGC5509	0.346
274	16206	ILMN_1802397	GNA11	0.346
275	14892	ILMN_1789349	UBQLN4	0.346
276	18128	ILMN_2073184	EDG8	0.346
277	16273	ILMN_1803094	PDGFD	0.346
278	11514	ILMN_1755504	CALCOCO2	0.346
279	9542	ILMN_1736597	TKT	0.346
280	2687	ILMN_1673950	GENX-3414	0.346
281	3969	ILMN_1684982	PDK4	0.346
282	20766	ILMN_2226324	BRP44L	0.346
283	11625	ILMN_1756676	PHF19	0.346
284	9253	ILMN_1733690	AKAP7	0.346
285	3473	ILMN_1680652	SELENBP1	0.346
286	8221	ILMN_1723846	DKFZP586D0919	0.346
287	7704	ILMN_1718853	UQCRC2	0.346
288	5955	ILMN_1702817	B3GNTL1	0.346
289	10965	ILMN_1750101	S100A11	0.346
290	6057	ILMN_1703648	LOC388595	0.345
291	21540	ILMN_2281502	DHRS9	0.345
292	21480	ILMN_2278335	LOC441282	0.345
293	3456	ILMN_1680424	CTSG	0.343
294	20926	ILMN_2234697	BEX1	0.343
295	7342	ILMN_1715612	OTOP2	0.342
296	2649	ILMN_1673639	ABI3BP	0.342
297	11229	ILMN_1752668	DAAM2	0.342
298	9433	ILMN_1735502	MGC33846	0.34
299	16360	ILMN_1803855	FAIM2	0.339
300	9595	ILMN_1737036	GGTL3	0.339
301	12410	ILMN_1764309	ADH1A	0.337
302	7117	ILMN_1713499	WISP1	0.337
303	11834	ILMN_1758672	FAM107B	0.337
304	2302	ILMN_1670535	NDRG2	0.337
305	1576	ILMN_1664177	ATXN7L2	0.337
306	2987	ILMN_1676555	FLJ12571	0.337
307	4995	ILMN_1694106	GPD1L	0.337
308	6907	ILMN_1711566	TIMP1	0.337
309	4554	ILMN_1690209	C1orf186	0.333
310	3324	ILMN_1679391	MAMDC2	0.333
311	5909	ILMN_1702487	SGK	0.332
312	17447	ILMN_1814296	TRPM6	0.332
313	7081	ILMN_1713088	MSI2	0.332
314	10228	ILMN_1742577	GTPBP4	0.332
315	8765	ILMN_1728803	HMP19	0.332
316	6541	ILMN_1708107	DPT	0.332
317	23941	ILMN_2396272	PDCD4	0.332
318	11182	ILMN_1752214	UGT2B17	0.331
319	20297	ILMN_2199439	CA2	0.331
320	10850	ILMN_1748983	RTN4	0.33
321	8146	ILMN_1723035	OLR1	0.33
322	24487	ILMN_2415011	DCTD	0.33
323	533	ILMN_1655642	KIAA1794	0.33
324	22098	ILMN_2317463	INTS1	0.33
325	3016	ILMN_1676745	ZNF142	0.33
326	18749	ILMN_2110751	CHRNA5	0.33
327	17502	ILMN_1815033	HPCA	0.33
328	8725	ILMN_1728478	CXCL16	0.33
329	15125	ILMN_1791593	MGC24039	0.33
330	22487	ILMN_2338323	CDC25B	0.33
331	2086	ILMN_1668822	BATF	0.33
332	16126	ILMN_1801616	EMP1	0.33
333	5171	ILMN_1695731	TUBG1	0.33
334	21671	ILMN_2289093	KIAA1618	0.33
335	8319	ILMN_1724700	RIOK3	0.33
336	20741	ILMN_2225144	EIF4E3	0.33
337	13329	ILMN_1773125	ENTPD1	0.33
338	12820	ILMN_1768480	VGLL4	0.33
339	459	ILMN_1655046	NUTF2	0.33
340	22110	ILMN_2317923	TMEM132A	0.33
341	6792	ILMN_1710523	ATP8B1	0.33
342	4865	ILMN_1693014	CEBPB	0.33
343	13987	ILMN_1779742	GABRD	0.33
344	3450	ILMN_1680390	GCNT2	0.33
345	5306	ILMN_1696806	CTNND1	0.33
346	22245	ILMN_2325168	ARRB1	0.33
347	6954	ILMN_1712023	SLC8A3	0.33
348	18271	ILMN_2082244	FOXK1	0.33
349	16298	ILMN_1803317	C9orf114	0.33
350	9335	ILMN_1734542	OVGP1	0.33
351	17065	ILMN_1810834	MSH5	0.33
352	21569	ILMN_2283398	DUSP4	0.33
353	11707	ILMN_1757370	SMPD1	0.33
354	6203	ILMN_1705093	ORC5L	0.33
355	17467	ILMN_1814629	ZC3H12B	0.329
356	18623	ILMN_2103107	ADAMDEC1	0.328
357	6693	ILMN_1709486	SRPX	0.328
358	2955	ILMN_1676296	PPAP2A	0.328
359	15104	ILMN_1791447	CXCL12	0.328
360	618	ILMN_1656300	GFRA2	0.328
361	5463	ILMN_1698259	TMEM100	0.328
362	3222	ILMN_1678579	CPT2	0.328
363	4445	ILMN_1689111	CXCL12	0.328
364	11415	ILMN_1754489	FBXL20	0.328
365	19779	ILMN_2171481	FAM55A	0.328
366	7870	ILMN_1720461	SLC17A4	0.328
367	12774	ILMN_1768016	TNFRSF17	0.328
368	3929	ILMN_1684591	ZNF434	0.327
369	23143	ILMN_2366795	KIF27	0.327
370	22105	ILMN_2317658	SLC3A2	0.327
371	20545	ILMN_2213136	LEF1	0.327
372	6805	ILMN_1710668	LETM1	0.327
373	22251	ILMN_2325394	MSH5	0.327
374	13271	ILMN_1772667	P2RY1	0.327
375	12386	ILMN_1764030	CCL23	0.327
376	8816	ILMN_1729288	C1QTNF6	0.327
377	8927	ILMN_1730491	FMNL2	0.327
378	2761	ILMN_1674609	CLTB	0.327
379	11770	ILMN_1758034	ETFDH	0.327
380	4526	ILMN_1689976	EDIL3	0.327
381	9463	ILMN_1735798	OSBPL3	0.327
382	23963	ILMN_2396982	BCL2L12	0.327
383	16763	ILMN_1807925	GNG2	0.327
384	24052	ILMN_2400219	SRI	0.327
385	8007	ILMN_1721769	FBLN2	0.327
386	11444	ILMN_1754753	IL6R	0.327
387	19696	ILMN_2166696	ANGPTL5	0.327
388	12389	ILMN_1764043	TTL	0.327
389	3886	ILMN_1684271	ACBD6	0.327
390	2967	ILMN_1676383	ENPP6	0.327
391	14700	ILMN_1787370	PRO1853	0.327
392	4394	ILMN_1688698	ZFHX1B	0.327
393	8941	ILMN_1730620	ARRB1	0.327
394	12851	ILMN_1768784	PSMC2	0.327
395	15855	ILMN_1798841	PLCXD3	0.327
396	11993	ILMN_1760332	PIGL	0.327
397	11787	ILMN_1758164	STC1	0.327
398	16972	ILMN_1809951	ZNF200	0.327
399	11840	ILMN_1758728	FANCG	0.327
400	607	ILMN_1656196	E2F6	0.327
401	14414	ILMN_1784333	KIAA0256	0.327
402	9402	ILMN_1735157	GALNT12	0.327
403	24246	ILMN_2406501	SOD2	0.327
404	23494	ILMN_2380494	ANXA11	0.327
405	14740	ILMN_1787815	TRIB3	0.327
406	16115	ILMN_1801504	RUNX1	0.327
407	12393	ILMN_1764096	CCBL1	0.327
408	23378	ILMN_2375879	VEGFA	0.327
409	23165	ILMN_2367258	SMOX	0.327
410	5974	ILMN_1702973	FLJ13391	0.327
411	12325	ILMN_1763516	SPINK2	0.327
412	19748	ILMN_2169692	SCN9A	0.327
413	13527	ILMN_1775183	CBX8	0.327
414	14116	ILMN_1781155	LYN	0.327
415	6816	ILMN_1710740	C2	0.327
416	1454	ILMN_1663092	CITED2	0.327
417	24219	ILMN_2405602	OSBPL1A	0.327
418	20144	ILMN_2191436	POLA1	0.327
419	19660	ILMN_2163819	KIF21B	0.327
420	15703	ILMN_1797425	DDX55	0.327
421	3150	ILMN_1677887	PMS2	0.327
422	3406	ILMN_1680091	POP7	0.327
423	15594	ILMN_1796417	ASNS	0.327
424	9061	ILMN_1731609	CHMP6	0.327
425	17856	ILMN_2055477	EXOSC7	0.327
426	351	ILMN_1654060	MKNK2	0.327
427	6628	ILMN_1708936	EXOSC3	0.327
428	19546	ILMN_2157020	SNORD48	0.327
429	17992	ILMN_2064694	STIM1	0.327
430	3729	ILMN_1682996	LOH11CR2A	0.327
431	18005	ILMN_2065690	GRAMD3	0.327
432	24436	ILMN_2413158	PODXL	0.327
433	20251	ILMN_2197128	OSR1	0.327
434	5263	ILMN_1696434	LAMA1	0.327
435	17420	ILMN_1813957	CEACAM7	0.327
436	22002	ILMN_2310909	ATP2A3	0.327
437	24369	ILMN_2410929	PAPSS2	0.327
438	4966	ILMN_1693891	MOGAT2	0.327
439	9134	ILMN_1732398	SCGB2A1	0.327
440	3799	ILMN_1683562	SNRPG	0.325
441	13985	ILMN_1779711	DTL	0.323
442	3669	ILMN_1682428	C1orf59	0.323
443	4609	ILMN_1690682	B3GALT4	0.322
444	22319	ILMN_2329569	C9orf116	0.322
445	16922	ILMN_1809456	CNTFR	0.322
446	12769	ILMN_1767894	POLB	0.322
447	22057	ILMN_2313946	CPNE7	0.322
448	9667	ILMN_1737650	DIO2	0.322
449	6023	ILMN_1703330	FEM1C	0.322
450	18729	ILMN_2109489	GZMB	0.322
451	14913	ILMN_1789492	ZDHHC8	0.322
452	18314	ILMN_2085236	SNX24	0.322
453	5962	ILMN_1702858	ADHFE1	0.321
454	21331	ILMN_2268068	MAPKAP1	0.319
455	10428	ILMN_1744676	ZNF179	0.318
456	5717	ILMN_1700811	UBPH	0.318
457	691	ILMN_1656902	HECTD3	0.318
458	10546	ILMN_1745849	ENTPD5	0.318
459	4227	ILMN_1687315	RXRA	0.318
460	8302	ILMN_1724497	ABI2	0.318
461	5659	ILMN_1700310	SDCBP2	0.318
462	1136	ILMN_1660413	SGK2	0.317
463	7024	ILMN_1712608	BFSP1	0.317
464	5762	ILMN_1701308	COL1A1	0.317
465	22903	ILMN_2357542	VIP	0.317
466	2719	ILMN_1674231	CHAF1B	0.316
467	17727	ILMN_2048700	ATAD2	0.316
468	17786	ILMN_2052331	MYOC	0.315
469	20019	ILMN_2184556	SLC4A4	0.314
470	21914	ILMN_2302654	LRP8	0.314
471	22846	ILMN_2355168	MGST1	0.314
472	23219	ILMN_2369580	C16orf35	0.314
473	12486	ILMN_1765043	RPL38	0.314
474	6512	ILMN_1707858	H2AFZ	0.314
475	18948	ILMN_2121979	UGT2A3	0.314
476	3459	ILMN_1680453	ITM2C	0.314
477	24311	ILMN_2408796	C19orf28	0.314
478	792	ILMN_1657708	MGLL	0.314
479	2529	ILMN_1672486	TCF7L2	0.314
480	8920	ILMN_1730416	CYCS	0.314
481	15539	ILMN_1795918	CENTG3	0.314
482	10961	ILMN_1750088	VRK2	0.314
483	5823	ILMN_1701827	IGSF4B	0.314
484	23498	ILMN_2380605	MTMR3	0.314
485	19368	ILMN_2147114	PSPH	0.314
486	1087	ILMN_1659990	HIG2	0.314
487	4304	ILMN_1687922	RP9	0.314
488	5127	ILMN_1695317	RCBTB1	0.314
489	15244	ILMN_1792800	LCN6	0.314
490	5842	ILMN_1701940	FAM73B	0.314
491	5633	ILMN_1700024	UST	0.314
492	19558	ILMN_2157544	GBF1	0.314
493	4520	ILMN_1689932	C9orf112	0.314
494	14587	ILMN_1786108	RBM21	0.314
495	2016	ILMN_1668134	GSTM1	0.314
496	565	ILMN_1655915	MMP11	0.313
497	14848	ILMN_1788886	TOX	0.313
498	19451	ILMN_2151114	VSNL1	0.313
499	24258	ILMN_2406892	C19orf2	0.313
500	7568	ILMN_1717636	RGMA	0.313
501	1110	ILMN_1660222	MTBP	0.313
502	6344	ILMN_1706342	FLJ31413	0.311
503	2431	ILMN_1671482	GALM	0.311
504	13955	ILMN_1779416	SCUBE2	0.311
505	24407	ILMN_2412214	LGALS9	0.311
506	9185	ILMN_1733042	BCAS1	0.311
507	12636	ILMN_1766408	CBFB	0.311
508	19003	ILMN_2124802	MT1H	0.311
509	14015	ILMN_1780060	FCN3	0.311
510	2035	ILMN_1668345	OAF	0.311
511	22299	ILMN_2328378	OSBPL3	0.311
512	13836	ILMN_1778319	ZD52F10	0.311
513	7208	ILMN_1714384	PCCA	0.311
514	13427	ILMN_1774229	SLC7A4	0.31
515	5484	ILMN_1698487	SDHD	0.31
516	9793	ILMN_1738712	ITR	0.309
517	6645	ILMN_1709039	RPL13	0.309
518	24352	ILMN_2410421	NBPF1	0.309
519	15696	ILMN_1797362	LIMK1	0.309
520	19763	ILMN_2170515	C9orf32	0.309
521	23406	ILMN_2376723	CDKN2B	0.309
522	5773	ILMN_1701402	IKIP	0.309
523	22992	ILMN_2361181	C1QTNF6	0.309
524	18943	ILMN_2121555	FBXO5	0.309
525	24306	ILMN_2408683	PPAP2B	0.309
526	1961	ILMN_1667578	DUSP26	0.309
527	19026	ILMN_2126239	SMG5	0.309
528	16515	ILMN_1805481	C6orf75	0.309
529	4180	ILMN_1686906	TP53INP2	0.309
530	18108	ILMN_2071826	RNF152	0.309
531	16028	ILMN_1800659	PGM1	0.309
532	14997	ILMN_1790508	KCNA5	0.309
533	18411	ILMN_2091375	KRCC1	0.309
534	13488	ILMN_1774836	PLOD3	0.309
535	21949	ILMN_2306540	PDE9A	0.309
536	3134	ILMN_1677794	BRCA2	0.309
537	10678	ILMN_1747197	SLC41A2	0.309
538	16814	ILMN_1808404	RHBDF1	0.309
539	16910	ILMN_1809323	C9orf125	0.309
540	15852	ILMN_1798819	DTNB	0.309
541	9231	ILMN_1733523	NARG1L	0.309
542	4732	ILMN_1691731	PARP14	0.309
543	13400	ILMN_1773935	TPARL	0.309
544	21513	ILMN_2279961	LAMP2	0.309
545	24429	ILMN_2412922	C14orf43	0.309
546	14803	ILMN_1788387	UGCGL2	0.309
547	2332	ILMN_1670723	MSL3L1	0.309
548	20174	ILMN_2193214	MPND	0.309
549	3904	ILMN_1684391	PLOD1	0.309
550	23961	ILMN_2396948	PSMC3IP	0.309
551	10137	ILMN_1741684	SMPD1	0.309
552	13336	ILMN_1773228	DLST	0.309
553	20584	ILMN_2215545	C3orf26	0.309
554	20692	ILMN_2222880	SLC25A42	0.309
555	1095	ILMN_1660086	MYH11	0.309
556	7028	ILMN_1712628	GTF2IRD1	0.309
557	12380	ILMN_1763907	C6orf173	0.309
558	24035	ILMN_2399523	JAG2	0.309
559	7426	ILMN_1716300	CDH7	0.309
560	14742	ILMN_1787843	HSDL2	0.309
561	3098	ILMN_1677497	STAB2	0.309
562	1653	ILMN_1664855	PPP1R14C	0.309
563	464	ILMN_1655117	WDR19	0.309
564	23289	ILMN_2372199	C6orf1	0.309
565	11026	ILMN_1750790	GSTM5	0.309
566	5385	ILMN_1697614	NHP2L1	0.309
567	5550	ILMN_1699265	TNFRSF10B	0.309
568	11896	ILMN_1759312	AMPD1	0.309
569	13689	ILMN_1776905	LOC340843	0.309
570	4649	ILMN_1691048	SLC22A18AS	0.309
571	16114	ILMN_1801491	SLC26A2	0.309
572	24526	ILMN_2416019	ENTPD8	0.309
573	13941	ILMN_1779353	PUS7	0.309
574	22804	ILMN_2353143	FBLIM1	0.308
575	21111	ILMN_2251375	ZFP64	0.308
576	5575	ILMN_1699570	TPD52L2	0.308
577	13117	ILMN_1771026	GARS	0.308
578	6749	ILMN_1710052	CPT1A	0.308
579	5522	ILMN_1698934	CMTM7	0.308
580	8334	ILMN_1724822	LOC399744	0.308
581	3900	ILMN_1684357	C14orf139	0.308
582	3326	ILMN_1679405	DDX56	0.308
583	20680	ILMN_2222234	PRDX4	0.308
584	15757	ILMN_1797892	SCN11A	0.308
585	3010	ILMN_1676709	SDK2	0.308
586	3035	ILMN_1676946	AP3M2	0.308
587	13617	ILMN_1776088	NAT9	0.308
588	5774	ILMN_1701403	HIP1	0.308
589	4234	ILMN_1687359	MRPS23	0.308
590	3100	ILMN_1677509	PRR7	0.308
591	19691	ILMN_2166524	CCNYL1	0.308
592	9593	ILMN_1737015	RPL39	0.308
593	13031	ILMN_1770290	CNN2	0.308
594	3074	ILMN_1677292	LOC90355	0.308
595	19767	ILMN_2170814	LAMP3	0.308
596	4149	ILMN_1686553	KIAA1287	0.308
597	23347	ILMN_2374352	DBNDD1	0.308
598	8506	ILMN_1726575	CHODL	0.308
599	20930	ILMN_2234873	NME2	0.308
600	11985	ILMN_1760280	NXT1	0.308
601	585	ILMN_1656057	PLAU	0.308
602	9475	ILMN_1735996	NOX4	0.307
603	14146	ILMN_1781454	RAE1	0.307
604	477	ILMN_1655229	SLC7A11	0.307
605	19677	ILMN_2165354	DCAMKL1	0.306
606	13649	ILMN_1776363	ANK2	0.306
607	22758	ILMN_2351466	HNT	0.306
608	12336	ILMN_1763587	TNMD	0.306
609	19319	ILMN_2143795	MGC4677	0.304
610	5927	ILMN_1702633	RetSat	0.304
611	6233	ILMN_1705301	TEAD4	0.304
612	23137	ILMN_2366654	NR5A2	0.304
613	23599	ILMN_2383871	ZNF74	0.304
614	10607	ILMN_1746465	FJX1	0.304
615	7880	ILMN_1720513	SETBP1	0.304
616	22146	ILMN_2320330	MAL	0.304
617	14200	ILMN_1781999	ABCF2	0.304
618	8958	ILMN_1730729	C1orf75	0.304
619	3750	ILMN_1683121	CYP2C18	0.304
620	6585	ILMN_1708486	CNN2	0.304
621	7351	ILMN_1715662	URB	0.304
622	4444	ILMN_1689110	NOB1P	0.304
623	12693	ILMN_1767129	ABCC8	0.304
624	19521	ILMN_2155172	BXDC2	0.304
625	24120	ILMN_2402341	MAPK3	0.304
626	5287	ILMN_1696615	CA8	0.302
627	160	ILMN_1652378	IPO7	0.301
628	4086	ILMN_1685916	KIF2C	0.301
629	14593	ILMN_1786189	MKI67IP	0.301
630	6990	ILMN_1712389	CKLF	0.298
631	4029	ILMN_1685467	ZNF397	0.298
632	8948	ILMN_1730645	TMEFF2	0.298
633	14494	ILMN_1785161	CHCHD6	0.298
634	16280	ILMN_1803194	GALK1	0.298
635	11267	ILMN_1753016	MRPL35	0.298
636	16803	ILMN_1808325	TM4SF19	0.298
637	23120	ILMN_2366041	ITM2C	0.298
638	9860	ILMN_1739275	HTR3C	0.298
639	18010	ILMN_2066020	TCEB1	0.298
640	13673	ILMN_1776653	SCML1	0.298
641	8520	ILMN_1726666	GPX3	0.298
642	21909	ILMN_2302075	MSI2	0.298
643	17748	ILMN_2049766	NFE2L3	0.298
644	7521	ILMN_1717163	F13A1	0.298
645	4040	ILMN_1685567	TGDS	0.298
646	13341	ILMN_1773278	OR8D4	0.298
647	22811	ILMN_2353431	ANKRD16	0.298
648	5118	ILMN_1695226	DIAPH3	0.298
649	16026	ILMN_1800642	RELN	0.297
650	1922	ILMN_1667199	SQRDL	0.297
651	7393	ILMN_1715994	HGS	0.297
652	16290	ILMN_1803256	STOX2	0.297
653	23235	ILMN_2370241	TEX11	0.297
654	7711	ILMN_1718907	SDCCAG33	0.296
655	16278	ILMN_1803180	PRDX6	0.296
656	4973	ILMN_1693941	IGSF9	0.296
657	23817	ILMN_2391512	ASAHL	0.296
658	23082	ILMN_2364414	PCDHA6	0.296
659	687	ILMN_1656840	VPS13D	0.296
660	1112	ILMN_1660232	PEX5	0.296
661	6326	ILMN_1706149	MGC13096	0.296
662	6204	ILMN_1705107	SDCBP2	0.296
663	11875	ILMN_1759075	TNFRSF13B	0.296
664	17807	ILMN_2053345	KCNT2	0.296
665	21650	ILMN_2287941	CYLD	0.296
666	8986	ILMN_1730945	C19orf4	0.296
667	23729	ILMN_2388547	EPSTI1	0.296
668	23746	ILMN_2389151	UGP2	0.296
669	8130	ILMN_1722869	PDZD3	0.296
670	1931	ILMN_1667260	MAPK3	0.296
671	23704	ILMN_2387952	FLJ20152	0.296
672	9877	ILMN_1739441	GANAB	0.296
673	4858	ILMN_1692938	PSAT1	0.296
674	13677	ILMN_1776724	MGC52057	0.295
675	23328	ILMN_2373670	UGT2B17	0.294
676	20227	ILMN_2195703	PPARGC1B	0.294
677	20719	ILMN_2224143	MCM3	0.294
678	10869	ILMN_1749114	OTC	0.294
679	7881	ILMN_1720526	C16orf60	0.294
680	21603	ILMN_2285375	SORD	0.294
681	1099	ILMN_1660114	MMRN1	0.294
682	15573	ILMN_1796210	PPRC1	0.294
683	3933	ILMN_1684628	ZFP90	0.294
684	16087	ILMN_1801246	IFITM1	0.294
685	2728	ILMN_1674337	FKBP2	0.294
686	23980	ILMN_2397627	UPF3B	0.293
687	17008	ILMN_1810235	ATP6V1E2	0.293
688	7983	ILMN_1721580	TBX15	0.292
689	6169	ILMN_1704665	GPM6B	0.292
690	19024	ILMN_2126038	STMN2	0.292
691	4226	ILMN_1687306	LGALS2	0.292
692	14199	ILMN_1781996	NUDT16	0.292
693	12228	ILMN_1762594	CARD15	0.292
694	2021	ILMN_1668194	LMTK3	0.292
695	22888	ILMN_2357062	IL1RAP	0.292
696	15776	ILMN_1798081	PTPRF	0.292
697	17330	ILMN_1813236	C6orf136	0.292
698	17187	ILMN_1811754	NDUFB10	0.292
699	9135	ILMN_1732410	SLC16A9	0.292
700	8623	ILMN_1727540	C1orf112	0.292
701	12903	ILMN_1769140	KIAA1958	0.292
702	7008	ILMN_1712505	KDELC1	0.292
703	18576	ILMN_2100357	SMPDL3A	0.292
704	14736	ILMN_1787762	HEATR1	0.292
705	2469	ILMN_1671891	FLJ20701	0.292
706	11703	ILMN_1757347	C22orf9	0.292
707	7025	ILMN_1712613	PNLIPRP2	0.292
708	15610	ILMN_1796589	TRIP13	0.292
709	12585	ILMN_1765966	CHGB	0.292
710	19557	ILMN_2157510	BLOC1S1	0.292
711	3075	ILMN_1677305	PVR	0.292
712	18992	ILMN_2124352	DCUN1D5	0.292
713	6477	ILMN_1707484	GEMIN6	0.292
714	7481	ILMN_1716803	LOC138046	0.292
715	22531	ILMN_2340347	PC	0.292
716	12768	ILMN_1767892	DUSP12	0.292
717	4504	ILMN_1689720	PPP2R3B	0.292
718	512	ILMN_1655521	DMRTA1	0.292
719	21802	ILMN_2295987	NBPF1	0.292
720	16539	ILMN_1805750	IFITM3	0.292
721	6299	ILMN_1705848	CXorf44	0.292
722	15153	ILMN_1791884	LOC128439	0.292
723	12577	ILMN_1765858	CAB39	0.292
724	3070	ILMN_1677261	LZTS1	0.292
725	22826	ILMN_2354237	PARP2	0.292
726	17946	ILMN_2061310	SUHW3	0.292
727	16036	ILMN_1800750	ZNF692	0.292
728	20548	ILMN_2213297	C11orf54	0.292
729	2206	ILMN_1669696	FLJ38451	0.292
730	15514	ILMN_1795678	POLR3C	0.292
731	19477	ILMN_2152429	FLJ40142	0.292
732	24270	ILMN_2407482	ITPA	0.292
733	16215	ILMN_1802458	AGTRAP	0.292
734	12276	ILMN_1763091	C14orf43	0.292
735	24146	ILMN_2403247	CMTM7	0.292
736	22588	ILMN_2342835	P2RY14	0.292
737	6246	ILMN_1705397	PDK2	0.292
738	11287	ILMN_1753183	CDCA4	0.292
739	8497	ILMN_1726512	ZSCAN2	0.292
740	9997	ILMN_1740493	TRAF5	0.292
741	2998	ILMN_1676625	SS18L1	0.292
742	4677	ILMN_1691291	PIGS	0.292
743	16905	ILMN_1809292	IMMP2L	0.292
744	11977	ILMN_1760201	DNMT1	0.292
745	16708	ILMN_1807277	IFI30	0.292
746	5780	ILMN_1701457	FAHD1	0.292
747	11139	ILMN_1751793	PCNXL2	0.292
748	14763	ILMN_1788024	FLJ11305	0.292
749	10024	ILMN_1740717	ADH1C	0.292
750	11630	ILMN_1756701	MGC4172	0.292
751	6616	ILMN_1708858	CSNK1E	0.292
752	16207	ILMN_1802404	ABCC1	0.292
753	4027	ILMN_1685441	DDEFL1	0.292
754	10593	ILMN_1746317	NUPL1	0.292
755	22466	ILMN_2337263	PKIB	0.292
756	19165	ILMN_2133996	SHE	0.292
757	3212	ILMN_1678493	CHN1	0.292
758	2779	ILMN_1674706	MTHFD2	0.292
759	4367	ILMN_1688480	CCND1	0.292
760	24059	ILMN_2400372	SULT1A2	0.292
761	18358	ILMN_2087989	ZFAND1	0.292
762	9890	ILMN_1739586	FEZ2	0.292
763	16153	ILMN_1801869	WDR75	0.292
764	23408	ILMN_2376822	SDCBP2	0.292
765	21161	ILMN_2254962	ACSS2	0.291
766	4806	ILMN_1692394	KIAA1024	0.291
767	1455	ILMN_1663099	UBE2B	0.291
768	17288	ILMN_1812777	MRPL35	0.291
769	20543	ILMN_2212999	KIF5C	0.291
770	15883	ILMN_1799099	TEKT3	0.291
771	936	ILMN_1658800	BRPF3	0.291
772	10984	ILMN_1750312	OSTbeta	0.291
773	3499	ILMN_1680874	TUBB2B	0.291
774	4453	ILMN_1689160	DPEP2	0.291
775	19950	ILMN_2180848	COCH	0.291
776	22559	ILMN_2341661	ETV4	0.29
777	12341	ILMN_1763612	KIAA1944	0.289
778	2179	ILMN_1669502	E2F3	0.289
779	13199	ILMN_1771957	MAN1B1	0.289
780	16687	ILMN_1807074	MIF	0.289
781	19184	ILMN_2135175	SNORD36A	0.289
782	15762	ILMN_1797933	MRPL17	0.289
783	2185	ILMN_1669550	MAD2L2	0.289
784	11138	ILMN_1751789	HNMT	0.289
785	6631	ILMN_1708950	ASPHD1	0.289
786	3648	ILMN_1682232	MIER1	0.289
787	17240	ILMN_1812302	FAM82A	0.289
788	1280	ILMN_1661577	MAFA	0.289
789	1716	ILMN_1665435	GPR30	0.289
790	9507	ILMN_1736234	C1orf77	0.289
791	9609	ILMN_1737157	GRAMD1A	0.289
792	12012	ILMN_1760506	LOC158160	0.289
793	7017	ILMN_1712545	S100A3	0.289
794	21394	ILMN_2273103	ELK4	0.289
795	9594	ILMN_1737025	PLCL2	0.289
796	13943	ILMN_1779370	ARHGEF9	0.289
797	16614	ILMN_1806407	SEMA6D	0.289
798	2610	ILMN_1673352	IFITM2	0.289
799	12028	ILMN_1760688	SAMD14	0.289
800	10084	ILMN_1741200	RFX5	0.289
801	10612	ILMN_1746517	KYNU	0.289
802	9008	ILMN_1731113	ZNF297B	0.289
803	20753	ILMN_2225709	PTCD1	0.289
804	4730	ILMN_1691717	RHBDF2	0.289
805	22813	ILMN_2353633	EMR2	0.289
806	17662	ILMN_2044617	MTERFD1	0.289
807	5251	ILMN_1696316	CPT1A	0.289
808	17248	ILMN_1812392	TMSB10	0.289
809	15868	ILMN_1798971	FZD5	0.289
810	17481	ILMN_1814770	CPNE4	0.289
811	24496	ILMN_2415235	CSNK1E	0.289
812	12718	ILMN_1767362	ADAMTS6	0.289
813	22210	ILMN_2323491	NUP62	0.289
814	16953	ILMN_1809730	RXRG	0.289
815	11248	ILMN_1752884	AADACL2	0.289
816	10297	ILMN_1743232	MICALCL	0.289
817	15010	ILMN_1790625	CBX3	0.289
818	10026	ILMN_1740737	DCPS	0.289
819	19074	ILMN_2129161	LRRC32	0.289
820	11814	ILMN_1758457	TBC1D16	0.289
821	8764	ILMN_1728802	SDCCAG8	0.289
822	19462	ILMN_2151541	DNAJC10	0.289
823	4166	ILMN_1686748	TMEM9	0.289
824	18632	ILMN_2103591	MORC2	0.289
825	5202	ILMN_1695962	SLC12A9	0.289
826	4191	ILMN_1686985	MTM1	0.289
827	23790	ILMN_2390609	ANK3	0.289
828	21963	ILMN_2307656	AGTRAP	0.289
829	5864	ILMN_1702171	AYTL2	0.289
830	7675	ILMN_1718610	ARHGAP17	0.289
831	10561	ILMN_1745964	IRAK2	0.289
832	9076	ILMN_1731720	PDRG1	0.289
833	16963	ILMN_1809866	WDR74	0.289
834	5603	ILMN_1699728	BTD	0.289
835	23462	ILMN_2379130	IRAK1	0.289
836	3331	ILMN_1679476	GART	0.288
837	10658	ILMN_1747016	CEP55	0.288
838	11886	ILMN_1759184	MGC13170	0.288
839	1181	ILMN_1660793	PAQR4	0.288
840	22287	ILMN_2327795	RERE	0.288
841	22007	ILMN_2311089	BRCA1	0.287
842	4787	ILMN_1692223	LCN2	0.286
843	2661	ILMN_1673721	EXO1	0.286
844	7932	ILMN_1721029	RHEBL1	0.286
845	8831	ILMN_1729482	KLK15	0.286
846	2058	ILMN_1668540	C1orf181	0.286
847	22015	ILMN_2311674	ADCY6	0.286
848	452	ILMN_1654946	ZNF447	0.285
849	19506	ILMN_2154157	CHRNA3	0.285
850	24512	ILMN_2415583	HS6ST2	0.284
851	14161	ILMN_1781626	C1S	0.284
852	16283	ILMN_1803213	MXRA5	0.284
853	19631	ILMN_2162253	NMU	0.284
854	16630	ILMN_1806533	PDE7B	0.284
855	16689	ILMN_1807095	MRPS36	0.284
856	12520	ILMN_1765310	TCEAL2	0.284
857	11048	ILMN_1751028	SERPINH1	0.283
858	21496	ILMN_2278984	FAM55D	0.283
859	6548	ILMN_1708151	DXS9879E	0.282
860	8211	ILMN_1723709	C9orf116	0.282
861	12943	ILMN_1769520	UBE2L6	0.282
862	2350	ILMN_1670841	CPNE1	0.282
863	1468	ILMN_1663171	MATN3	0.282
864	14712	ILMN_1787511	THUMPD2	0.282
865	21956	ILMN_2307025	CPNE1	0.282
866	11153	ILMN_1751904	EDNRB	0.282
867	8585	ILMN_1727200	SLCO4A1	0.282
868	23029	ILMN_2362681	CES2	0.282
869	4386	ILMN_1688633	CLCN2	0.282
870	13919	ILMN_1779147	ENC1	0.282
871	13827	ILMN_1778242	CALM1	0.282
872	14477	ILMN_1784871	FASN	0.282
873	12491	ILMN_1765076	DIP13B	0.282
874	8227	ILMN_1723909	LOC402176	0.282
875	16666	ILMN_1806867	PPM1G	0.282
876	20103	ILMN_2189406	C15orf38	0.282
877	15280	ILMN_1793267	ETHE1	0.282
878	12344	ILMN_1763638	BCAR3	0.282
879	14437	ILMN_1784540	KBTBD2	0.282
880	10208	ILMN_1742390	FRMD1	0.282
881	22289	ILMN_2327860	MAL	0.282
882	10563	ILMN_1745988	NUDT12	0.282
883	17758	ILMN_2050617	CCT6AP1	0.282
884	23139	ILMN_2366710	UCRC	0.282
885	4838	ILMN_1692731	TTYH3	0.282
886	15964	ILMN_1800008	ACAT1	0.282
887	8387	ILMN_1725338	CLDN23	0.282
888	8674	ILMN_1728009	PRP2	0.282
889	9307	ILMN_1734194	EXOSC3	0.282
890	8801	ILMN_1729180	GATM	0.282
891	11943	ILMN_1759910	SERPINA5	0.282
892	16828	ILMN_1808566	C10orf77	0.282
893	20148	ILMN_2191720	ZNF471	0.282
894	10207	ILMN_1742382	RIMS3	0.282
895	3859	ILMN_1684045	CDCA4	0.282
896	19610	ILMN_2160929	FEN1	0.282
897	5868	ILMN_1702197	C9orf140	0.282
898	3702	ILMN_1682775	EDN1	0.281
899	5167	ILMN_1695687	SALL4	0.281
900	6493	ILMN_1707695	IFIT1	0.281
901	7123	ILMN_1713550	LGR6	0.281
902	1813	ILMN_1666222	PHACTR3	0.281
903	13072	ILMN_1770663	KRT24	0.281
904	6750	ILMN_1710064	RDHE2	0.281
905	24232	ILMN_2406106	CACNB2	0.281
906	4927	ILMN_1693538	STK36	0.281
907	15690	ILMN_1797310	ATP6V1D	0.281
908	7043	ILMN_1712751	HADHA	0.281
909	981	ILMN_1659156	ANKRD16	0.281
910	15123	ILMN_1791580	FXYD3	0.281
911	23564	ILMN_2382906	PLCG1	0.281
912	13542	ILMN_1775348	KCNH8	0.281
913	23140	ILMN_2366714	UCRC	0.281
914	419	ILMN_1654671	LOC653705	0.281
915	9247	ILMN_1733648	SNAP91	0.281
916	883	ILMN_1658356	DKFZP586H2123	0.281
917	3628	ILMN_1682100	IGSF10	0.281
918	11129	ILMN_1751645	OR3A4	0.281
919	24295	ILMN_2408400	NSUN5	0.281
920	17089	ILMN_1810992	CAD	0.281
921	21506	ILMN_2279484	MGC13057	0.279
922	18705	ILMN_2107933	ZNF285A	0.279
923	2551	ILMN_1672660	MBP	0.279
924	17679	ILMN_2045849	SI	0.278
925	7725	ILMN_1718984	FCGBP	0.278
926	24017	ILMN_2399016	MMP28	0.276
927	9900	ILMN_1739645	ANLN	0.276
928	17067	ILMN_1810836	PDE5A	0.276
929	23329	ILMN_2373689	DIAPH3	0.276
930	850	ILMN_1658143	RFC3	0.276
931	1756	ILMN_1665797	CSE1L	0.276
932	6003	ILMN_1703178	SCG2	0.276
933	7448	ILMN_1716480	ACD	0.276
934	24216	ILMN_2405521	MTHFD2	0.276
935	13977	ILMN_1779616	SUCLG1	0.276
936	20088	ILMN_2188521	PVRL3	0.276
937	14455	ILMN_1784706	GABRE	0.276
938	18311	ILMN_2084836	CORO2B	0.276
939	6691	ILMN_1709483	MRE11A	0.276
940	840	ILMN_1658040	CRABP1	0.276
941	10453	ILMN_1744963	ERO1L	0.276
942	15490	ILMN_1795419	C2orf24	0.276
943	15476	ILMN_1795298	GPR30	0.276
944	10705	ILMN_1747546	TSPAN1	0.276
945	17407	ILMN_1813836	DARS	0.276
946	17030	ILMN_1810441	TRIM3	0.276
947	17125	ILMN_1811303	NR5A2	0.276
948	13280	ILMN_1772713	BMS1L	0.276
949	8954	ILMN_1730698	ODF2	0.276
950	2036	ILMN_1668351	TAF6	0.276
951	13068	ILMN_1770629	SLC17A7	0.276
952	20312	ILMN_2200503	NIT2	0.276
953	8102	ILMN_1722718	BMP2	0.276
954	13590	ILMN_1775814	GHR	0.276
955	2065	ILMN_1668605	ASAHL	0.276
956	5741	ILMN_1701094	CLN8	0.276
957	17854	ILMN_2055330	KIF26B	0.275
958	1007	ILMN_1659371	ADRA2A	0.275
959	21874	ILMN_2298860	HAGHL	0.275
960	10165	ILMN_1742003	RHPN1	0.275
961	14711	ILMN_1787509	PRIC285	0.275
962	4155	ILMN_1686610	APBA3	0.275
963	374	ILMN_1654319	HAPLN3	0.275
964	15615	ILMN_1796629	EDNRA	0.275
965	10112	ILMN_1741475	MGC22793	0.275
966	3879	ILMN_1684210	NPAL3	0.275
967	1516	ILMN_1663640	MAOA	0.275
968	13686	ILMN_1776858	DUS4L	0.275
969	17817	ILMN_2053679	ACADM	0.275
970	18968	ILMN_2123312	LRAP	0.275
971	4224	ILMN_1687301	CSPG2	0.275
972	2643	ILMN_1673586	SLC6A6	0.275
973	2273	ILMN_1670263	C1orf71	0.275
974	16417	ILMN_1804498	C7orf27	0.274
975	22137	ILMN_2319910	DGKA	0.274
976	19617	ILMN_2161330	SPDEF	0.274
977	9994	ILMN_1740479	FABP2	0.274
978	10099	ILMN_1741356	PRICKLE1	0.274
979	5686	ILMN_1700541	FBLN1	0.274
980	11569	ILMN_1756071	MFGE8	0.274
981	11486	ILMN_1755215	LOC389432	0.274
982	14898	ILMN_1789384	QSCN6L1	0.273
983	20265	ILMN_2197846	HADHB	0.273
984	6206	ILMN_1705116	C6orf85	0.273
985	6802	ILMN_1710619	C17orf73	0.273
986	7662	ILMN_1718449	NSUN5C	0.273
987	2615	ILMN_1673360	BDH2	0.273
988	1594	ILMN_1664330	CEACAM1	0.273
989	16140	ILMN_1801767	ABHD3	0.273
990	8115	ILMN_1722798	PLCD3	0.273
991	13545	ILMN_1775373	CMTM5	0.273
992	24266	ILMN_2407346	LDHD	0.273
993	7541	ILMN_1717313	NFKBIE	0.273
994	16493	ILMN_1805225	OACT5	0.273
995	9522	ILMN_1736441	PDXP	0.273
996	7317	ILMN_1715401	MT1G	0.273
997	11077	ILMN_1751228	C20orf46	0.273
998	20887	ILMN_2232463	ARL14	0.273
999	15736	ILMN_1797735	C1orf21	0.271
1000	18848	ILMN_2115974	GSDM1	0.271

## Sheet: mRMR features
Order	Feature	probes	Symbol	Score
1	9440	ILMN_1735578	GUCA2B	0.579
2	12623	ILMN_1766264	PI16	0.254
3	6129	ILMN_1704294	CDH3	0.193
4	19312	ILMN_2143314	SPIB	0.217
5	11545	ILMN_1755796	BEST2	0.225
6	22505	ILMN_2339192	HMGCLL1	0.213
7	19713	ILMN_2167758	CILP	0.213
8	20507	ILMN_2210934	NR3C2	0.204
9	17167	ILMN_1811598	ADH1B	0.2
10	7338	ILMN_1715583	BOP1	0.203
11	23622	ILMN_2384536	PECI	0.195
12	20016	ILMN_2184373	IL8	0.194
13	3294	ILMN_1679176	CLCA4	0.194
14	13079	ILMN_1770682	TEP1	0.189
15	3130	ILMN_1677765	LRP8	0.192
16	8287	ILMN_1724396	GCG	0.194
17	17255	ILMN_1812461	WISP2	0.195
18	13159	ILMN_1771467	TMIGD	0.188
19	13717	ILMN_1777190	CFD	0.187
20	8827	ILMN_1729450	MGC16824	0.189
21	6648	ILMN_1709044	TGIF2	0.189
22	1309	ILMN_1661799	LOC643940	0.19
23	16377	ILMN_1803997	SDCCAG3	0.187
24	21573	ILMN_2283772	LOC253012	0.188
25	3254	ILMN_1678816	GREM2	0.188
26	2321	ILMN_1670672	TMEM37	0.188
27	9039	ILMN_1731397	STMN4	0.186
28	6384	ILMN_1706635	ELA2	0.187
29	23777	ILMN_2390310	MGC14376	0.187
30	12032	ILMN_1760718	DKFZp761I2123	0.188
31	10050	ILMN_1740917	SCNN1B	0.191
32	16795	ILMN_1808245	RPESP	0.187
33	5115	ILMN_1695157	CA4	0.184
34	10772	ILMN_1748241	RP11-19J3.3	0.185
35	13530	ILMN_1775235	AFF3	0.184
36	12417	ILMN_1764380	GLTP	0.184
37	10155	ILMN_1741942	STX16	0.184
38	7567	ILMN_1717599	CNTN3	0.183
39	19439	ILMN_2150654	ZSWIM4	0.182
40	7767	ILMN_1719351	TCF21	0.182
41	13254	ILMN_1772521	MTHFD1L	0.183
42	18119	ILMN_2072568	CLDN8	0.184
43	10650	ILMN_1746888	PCOLCE2	0.182
44	11043	ILMN_1750969	C9orf10OS	0.183
45	13423	ILMN_1774207	ANGPT2	0.183
46	21988	ILMN_2309848	FXYD5	0.183
47	8576	ILMN_1727150	DHRS9	0.183
48	20158	ILMN_2192072	MMP7	0.183
49	3637	ILMN_1682176	CLEC3B	0.183
50	4751	ILMN_1691884	STC2	0.181
51	8687	ILMN_1728107	GNG7	0.183
52	21928	ILMN_2304404	MAWBP	0.183
53	17393	ILMN_1813704	KIAA1199	0.182
54	15088	ILMN_1791302	EFHC2	0.184
55	12062	ILMN_1761044	GNB1L	0.181
56	22421	ILMN_2334693	NARF	0.181
57	754	ILMN_1657435	MT1M	0.182
58	7878	ILMN_1720501	ABCA9	0.182
59	1797	ILMN_1666109	MB	0.182
60	14936	ILMN_1789648	SCGN	0.181
61	24099	ILMN_2401822	FTSJ1	0.181
62	4220	ILMN_1687275	JUB	0.181
63	13546	ILMN_1775380	SMOX	0.18
64	18383	ILMN_2089752	LOC285016	0.18
65	19479	ILMN_2152502	MGC72080	0.179
66	4676	ILMN_1691290	CELSR3	0.18
67	11052	ILMN_1751062	SCARA5	0.18
68	15624	ILMN_1796685	VMD2L2	0.18
69	5989	ILMN_1703075	PYY	0.179
70	12279	ILMN_1763127	CCBP2	0.178
71	19879	ILMN_2176592	BCHE	0.178
72	22459	ILMN_2336781	SOD2	0.179
73	18647	ILMN_2104356	COL1A2	0.178
74	371	ILMN_1654287	ADCY9	0.177
75	3032	ILMN_1676899	YEATS2	0.177
76	19438	ILMN_2150586	ZNF536	0.176
77	14425	ILMN_1784447	PLCE1	0.176
78	16443	ILMN_1804737	RAVER2	0.175
79	13825	ILMN_1778238	C17orf40	0.175
80	7111	ILMN_1713462	AQP8	0.174
81	5778	ILMN_1701441	EDG2	0.175
82	24522	ILMN_2415911	COVA1	0.174
83	19119	ILMN_2131293	LOC200810	0.174
84	23306	ILMN_2373062	RHBDF2	0.175
85	15432	ILMN_1794875	HMFN0839	0.175
86	6418	ILMN_1706859	LOC91689	0.173
87	13738	ILMN_1777397	MSX1	0.174
88	15453	ILMN_1795104	ACADS	0.174
89	19770	ILMN_2171023	LGI1	0.173
90	12361	ILMN_1763749	GUCA2A	0.174
91	10247	ILMN_1742788	PKD1L2	0.174
92	16785	ILMN_1808157	RPIB9	0.174
93	17566	ILMN_1815639	PERQ1	0.174
94	22355	ILMN_2331010	TNFRSF10B	0.174
95	5955	ILMN_1702817	B3GNTL1	0.173
96	12558	ILMN_1765620	MGC33530	0.173
97	10704	ILMN_1747506	DHX34	0.174
98	1539	ILMN_1663866	TGFBI	0.174
99	23411	ILMN_2376859	PDGFD	0.174
100	169	ILMN_1652431	CA1	0.173
101	18729	ILMN_2109489	GZMB	0.173
102	16274	ILMN_1803110	SF3B3	0.174
103	440	ILMN_1654861	ACO2	0.174
104	613	ILMN_1656285	METTL7A	0.174
105	4429	ILMN_1689001	CDK4	0.174
106	18271	ILMN_2082244	FOXK1	0.174
107	16949	ILMN_1809662	LOC440145	0.174
108	4312	ILMN_1687978	PHLDA1	0.174
109	17862	ILMN_2055760	KIAA1715	0.174
110	2165	ILMN_1669410	CHGA	0.174
111	4026	ILMN_1685433	COL8A1	0.174
112	1431	ILMN_1662935	C1QTNF7	0.174
113	20176	ILMN_2193315	C14orf143	0.174
114	8841	ILMN_1729563	UGDH	0.173
115	4707	ILMN_1691487	TRAF2	0.173
116	14271	ILMN_1782761	ARHGAP20	0.173
117	19811	ILMN_2173611	MT1E	0.174
118	51	ILMN_1651506	NCOA6IP	0.174
119	19956	ILMN_2181064	GBA3	0.173
120	655	ILMN_1656540	RUVBL1	0.173
121	4825	ILMN_1692623	LOC653950	0.172
122	13675	ILMN_1776679	TAZ	0.172
123	4282	ILMN_1687768	NCOA7	0.172
124	3739	ILMN_1683063	PDE9A	0.172
125	12370	ILMN_1763842	PTRH1	0.172
126	15604	ILMN_1796490	GRINA	0.172
127	2395	ILMN_1671191	UQCRC1	0.172
128	14998	ILMN_1790518	PHF16	0.173
129	12138	ILMN_1761789	CA7	0.172
130	18347	ILMN_2087528	CPSF3	0.172
131	1241	ILMN_1661309	XKR4	0.172
132	14151	ILMN_1781514	PCDH17	0.173
133	7569	ILMN_1717639	SNF1LK	0.172
134	10324	ILMN_1743445	FAM107A	0.172
135	3296	ILMN_1679194	UGT2B7	0.171
136	20109	ILMN_2189675	LOC646962	0.171
137	5487	ILMN_1698533	IDH3A	0.171
138	14974	ILMN_1790136	C20orf20	0.171
139	24351	ILMN_2410406	AKAP7	0.171
140	5795	ILMN_1701551	ABCA6	0.171
141	18128	ILMN_2073184	EDG8	0.171
142	7817	ILMN_1719906	HADHSC	0.171
143	16725	ILMN_1807493	ACVRL1	0.172
144	5376	ILMN_1697544	SLC25A29	0.171
145	9871	ILMN_1739397	GLMN	0.171
146	17363	ILMN_1813517	DISP2	0.171
147	1138	ILMN_1660426	CPSF4	0.171
148	1424	ILMN_1662886	RP11-450P7.3	0.171
149	20838	ILMN_2230016	HIGD1A	0.171
150	16672	ILMN_1806951	CSTF3	0.17
151	14969	ILMN_1790098	OGN	0.171
152	8645	ILMN_1727740	SYNCRIP	0.17
153	6816	ILMN_1710740	C2	0.17
154	21842	ILMN_2297710	PLEKHB2	0.17
155	5746	ILMN_1701131	MGC5509	0.17
156	21279	ILMN_2263466	ACADVL	0.17
157	21060	ILMN_2246956	BCL2	0.17
158	7861	ILMN_1720373	SLC7A5	0.17
159	9542	ILMN_1736597	TKT	0.169
160	21569	ILMN_2283398	DUSP4	0.169
161	1590	ILMN_1664294	LEPRE1	0.17
162	636	ILMN_1656395	MYOT	0.17
163	5171	ILMN_1695731	TUBG1	0.17
164	6127	ILMN_1704286	FXYD5	0.17
165	9061	ILMN_1731609	CHMP6	0.17
166	12291	ILMN_1763228	MEF2D	0.17
167	19696	ILMN_2166696	ANGPTL5	0.169
168	13439	ILMN_1774330	KIAA0523	0.17
169	9253	ILMN_1733690	AKAP7	0.17
170	5306	ILMN_1696806	CTNND1	0.17
171	12649	ILMN_1766613	ZNF121	0.17
172	12928	ILMN_1769394	PLCD1	0.17
173	14715	ILMN_1787526	MGC13057	0.17
174	16061	ILMN_1801090	KA21	0.169
175	11523	ILMN_1755620	IER5L	0.17
176	13987	ILMN_1779742	GABRD	0.17
177	18255	ILMN_2081335	C7orf44	0.17
178	11736	ILMN_1757627	ZMYND19	0.169
179	11356	ILMN_1753830	ETV4	0.169
180	9335	ILMN_1734542	OVGP1	0.169
181	14922	ILMN_1789535	DHDDS	0.169
182	8028	ILMN_1721989	ATP5F1	0.168
183	23676	ILMN_2387105	OGN	0.169
184	20733	ILMN_2224907	C4orf34	0.168
185	2086	ILMN_1668822	BATF	0.169
186	8162	ILMN_1723158	NOL1	0.169
187	8816	ILMN_1729288	C1QTNF6	0.168
188	22677	ILMN_2347349	CCNB1IP1	0.168
189	13732	ILMN_1777325	STAT1	0.169
190	8221	ILMN_1723846	DKFZP586D0919	0.168
191	21609	ILMN_2285568	ASAHL	0.168
192	3385	ILMN_1679949	SLC25A23	0.168
193	15562	ILMN_1796094	CD36	0.168
194	8318	ILMN_1724686	CLDN1	0.168
195	20439	ILMN_2206746	BGN	0.168
196	8249	ILMN_1724145	CBX4	0.167
197	19767	ILMN_2170814	LAMP3	0.167
198	21878	ILMN_2298988	ENTPD8	0.168
199	4292	ILMN_1687848	C7	0.168
200	8206	ILMN_1723678	PRPH	0.167
201	23747	ILMN_2389155	UGP2	0.167
202	12691	ILMN_1767111	TMEM16K	0.167
203	23498	ILMN_2380605	MTMR3	0.167
204	15139	ILMN_1791759	CXCL10	0.167
205	23508	ILMN_2380850	SDCCAG3	0.167
206	1355	ILMN_1662198	RANGAP1	0.167
207	6933	ILMN_1711807	LPHN3	0.167
208	24128	ILMN_2402581	Gcom1	0.167
209	10502	ILMN_1745420	PHF19	0.167
210	7050	ILMN_1712786	KIAA0828	0.166
211	14892	ILMN_1789349	UBQLN4	0.166
212	12386	ILMN_1764030	CCL23	0.166
213	14116	ILMN_1781155	LYN	0.166
214	9246	ILMN_1733627	NEDD4L	0.166
215	9071	ILMN_1731688	KLB	0.167
216	10821	ILMN_1748770	CKAP5	0.166
217	23469	ILMN_2379469	EIF3S9	0.166
218	24122	ILMN_2402392	COL8A1	0.166
219	9786	ILMN_1738681	NUP62	0.166
220	19833	ILMN_2174437	CIDEC	0.166
221	23652	ILMN_2386040	MYOHD1	0.166
222	8725	ILMN_1728478	CXCL16	0.166
223	4100	ILMN_1686082	C14orf79	0.166
224	13353	ILMN_1773395	RDH5	0.166
225	3428	ILMN_1680251	SORCS1	0.165
226	17502	ILMN_1815033	HPCA	0.165
227	20893	ILMN_2232854	FAP	0.165
228	3016	ILMN_1676745	ZNF142	0.165
229	5291	ILMN_1696657	LRRN5	0.165
230	20257	ILMN_2197381	PCK1	0.165
231	18289	ILMN_2083567	PHLPPL	0.165
232	16273	ILMN_1803094	PDGFD	0.165
233	6459	ILMN_1707310	MGLL	0.164
234	18725	ILMN_2109197	EPB41L3	0.164
235	16027	ILMN_1800654	MCM7	0.164
236	8790	ILMN_1729117	COL5A2	0.164
237	12325	ILMN_1763516	SPINK2	0.164
238	7342	ILMN_1715612	OTOP2	0.164
239	9310	ILMN_1734229	SPPL2A	0.164
240	24219	ILMN_2405602	OSBPL1A	0.164
241	4733	ILMN_1691736	ST6GALNAC6	0.164
242	6666	ILMN_1709237	EPHX2	0.164
243	14284	ILMN_1782897	GPIAP1	0.164
244	14427	ILMN_1784459	MMP3	0.164
245	19546	ILMN_2157020	SNORD48	0.164
246	15244	ILMN_1792800	LCN6	0.164
247	6683	ILMN_1709399	SLC25A34	0.164
248	18943	ILMN_2121555	FBXO5	0.164
249	13527	ILMN_1775183	CBX8	0.164
250	24246	ILMN_2406501	SOD2	0.164
251	7117	ILMN_1713499	WISP1	0.164
252	24169	ILMN_2404135	RIOK3	0.164
253	6954	ILMN_1712023	SLC8A3	0.164
254	21347	ILMN_2269136	CENTG3	0.164
255	20505	ILMN_2210753	XLKD1	0.164
256	19231	ILMN_2137789	KLF4	0.164
257	2114	ILMN_1669046	FOXQ1	0.164
258	8941	ILMN_1730620	ARRB1	0.163
259	14740	ILMN_1787815	TRIB3	0.163
260	17291	ILMN_1812824	SST	0.163
261	9667	ILMN_1737650	DIO2	0.163
262	24487	ILMN_2415011	DCTD	0.163
263	12077	ILMN_1761131	PECI	0.164
264	2687	ILMN_1673950	GENX-3414	0.163
265	3669	ILMN_1682428	C1orf59	0.163
266	11787	ILMN_1758164	STC1	0.163
267	6034	ILMN_1703433	PLSCR3	0.164
268	2800	ILMN_1674934	FOXF2	0.164
269	20545	ILMN_2213136	LEF1	0.163
270	11625	ILMN_1756676	PHF19	0.163
271	301	ILMN_1653529	TEX10	0.163
272	22600	ILMN_2343278	PPAP2A	0.163
273	10965	ILMN_1750101	S100A11	0.163
274	1734	ILMN_1665559	CDK2	0.163
275	5894	ILMN_1702363	SULF1	0.163
276	11415	ILMN_1754489	FBXL20	0.163
277	12820	ILMN_1768480	VGLL4	0.163
278	20569	ILMN_2214910	EPHB4	0.162
279	13336	ILMN_1773228	DLST	0.162
280	15757	ILMN_1797892	SCN11A	0.162
281	8007	ILMN_1721769	FBLN2	0.163
282	20652	ILMN_2219867	KRT20	0.162
283	18928	ILMN_2120695	TSPAN7	0.162
284	8920	ILMN_1730416	CYCS	0.162
285	11840	ILMN_1758728	FANCG	0.162
286	12447	ILMN_1764729	JAG2	0.162
287	19660	ILMN_2163819	KIF21B	0.162
288	14623	ILMN_1786396	ZZEF1	0.163
289	15703	ILMN_1797425	DDX55	0.162
290	18314	ILMN_2085236	SNX24	0.162
291	17665	ILMN_2044832	NOL5A	0.162
292	19689	ILMN_2166457	HPGD	0.162
293	22098	ILMN_2317463	INTS1	0.162
294	5974	ILMN_1702973	FLJ13391	0.162
295	7024	ILMN_1712608	BFSP1	0.162
296	24311	ILMN_2408796	C19orf28	0.161
297	7208	ILMN_1714384	PCCA	0.161
298	2298	ILMN_1670490	PDPN	0.161
299	3450	ILMN_1680390	GCNT2	0.161
300	22251	ILMN_2325394	MSH5	0.161
301	22110	ILMN_2317923	TMEM132A	0.161
302	2302	ILMN_1670535	NDRG2	0.161
303	14868	ILMN_1789096	OSTalpha	0.161
304	17584	ILMN_1815745	SOX4	0.161
305	12389	ILMN_1764043	TTL	0.161
306	22215	ILMN_2323801	MOCS1	0.161
307	11232	ILMN_1752728	FUCA1	0.161
308	20144	ILMN_2191436	POLA1	0.16
309	351	ILMN_1654060	MKNK2	0.16
310	15351	ILMN_1794074	MXI1	0.16
311	22057	ILMN_2313946	CPNE7	0.16
312	16797	ILMN_1808258	HTR4	0.16
313	11514	ILMN_1755504	CALCOCO2	0.16
314	22105	ILMN_2317658	SLC3A2	0.16
315	4526	ILMN_1689976	EDIL3	0.16
316	15125	ILMN_1791593	MGC24039	0.159
317	9593	ILMN_1737015	RPL39	0.159
318	18870	ILMN_2117508	CTHRC1	0.159
319	21802	ILMN_2295987	NBPF1	0.159
320	23613	ILMN_2384181	DHRS9	0.159
321	17992	ILMN_2064694	STIM1	0.159
322	6203	ILMN_1705093	ORC5L	0.159
323	19748	ILMN_2169692	SCN9A	0.159
324	16803	ILMN_1808325	TM4SF19	0.159
325	20680	ILMN_2222234	PRDX4	0.159
326	3209	ILMN_1678478	CHST5	0.159
327	20251	ILMN_2197128	OSR1	0.159
328	5167	ILMN_1695687	SALL4	0.159
329	2967	ILMN_1676383	ENPP6	0.159
330	12451	ILMN_1764769	LOH11CR2A	0.159
331	16953	ILMN_1809730	RXRG	0.159
332	23165	ILMN_2367258	SMOX	0.158
333	8765	ILMN_1728803	HMP19	0.158
334	16763	ILMN_1807925	GNG2	0.158
335	8334	ILMN_1724822	LOC399744	0.158
336	11866	ILMN_1758939	RIPK2	0.158
337	1961	ILMN_1667578	DUSP26	0.158
338	18749	ILMN_2110751	CHRNA5	0.158
339	9402	ILMN_1735157	GALNT12	0.158
340	5502	ILMN_1698685	MATN2	0.158
341	19691	ILMN_2166524	CCNYL1	0.158
342	13400	ILMN_1773935	TPARL	0.158
343	20766	ILMN_2226324	BRP44L	0.158
344	11834	ILMN_1758672	FAM107B	0.158
345	13199	ILMN_1771957	MAN1B1	0.158
346	2987	ILMN_1676555	FLJ12571	0.158
347	3729	ILMN_1682996	LOH11CR2A	0.158
348	23378	ILMN_2375879	VEGFA	0.158
349	9463	ILMN_1735798	OSBPL3	0.158
350	5163	ILMN_1695631	LOC63928	0.159
351	24436	ILMN_2413158	PODXL	0.158
352	19403	ILMN_2149164	SFRP1	0.158
353	12851	ILMN_1768784	PSMC2	0.158
354	9595	ILMN_1737036	GGTL3	0.158
355	19558	ILMN_2157544	GBF1	0.157
356	4865	ILMN_1693014	CEBPB	0.157
357	4809	ILMN_1692413	NMNAT1	0.158
358	3150	ILMN_1677887	PMS2	0.158
359	6628	ILMN_1708936	EXOSC3	0.158
360	8319	ILMN_1724700	RIOK3	0.158
361	12818	ILMN_1768469	TCN1	0.157
362	10212	ILMN_1742444	UGT2B10	0.158
363	3473	ILMN_1680652	SELENBP1	0.158
364	20741	ILMN_2225144	EIF4E3	0.158
365	12547	ILMN_1765557	OLFML2B	0.158
366	5287	ILMN_1696615	CA8	0.158
367	14700	ILMN_1787370	PRO1853	0.158
368	1576	ILMN_1664177	ATXN7L2	0.158
369	16206	ILMN_1802397	GNA11	0.158
370	16115	ILMN_1801504	RUNX1	0.157
371	2016	ILMN_1668134	GSTM1	0.157
372	22245	ILMN_2325168	ARRB1	0.157
373	11248	ILMN_1752884	AADACL2	0.157
374	17856	ILMN_2055477	EXOSC7	0.157
375	7704	ILMN_1718853	UQCRC2	0.157
376	7028	ILMN_1712628	GTF2IRD1	0.157
377	17065	ILMN_1810834	MSH5	0.157
378	16126	ILMN_1801616	EMP1	0.158
379	12380	ILMN_1763907	C6orf173	0.157
380	16972	ILMN_1809951	ZNF200	0.157
381	24352	ILMN_2410421	NBPF1	0.157
382	4149	ILMN_1686553	KIAA1287	0.157
383	477	ILMN_1655229	SLC7A11	0.157
384	6805	ILMN_1710668	LETM1	0.157
385	5773	ILMN_1701402	IKIP	0.157
386	459	ILMN_1655046	NUTF2	0.157
387	1454	ILMN_1663092	CITED2	0.157
388	3406	ILMN_1680091	POP7	0.157
389	9054	ILMN_1731529	MS4A12	0.157
390	14414	ILMN_1784333	KIAA0256	0.156
391	8927	ILMN_1730491	FMNL2	0.156
392	14015	ILMN_1780060	FCN3	0.156
393	16298	ILMN_1803317	C9orf114	0.156
394	15696	ILMN_1797362	LIMK1	0.156
395	8948	ILMN_1730645	TMEFF2	0.157
396	15265	ILMN_1793033	RBM28	0.157
397	10850	ILMN_1748983	RTN4	0.156
398	6541	ILMN_1708107	DPT	0.156
399	16360	ILMN_1803855	FAIM2	0.156
400	13271	ILMN_1772667	P2RY1	0.156
401	6512	ILMN_1707858	H2AFZ	0.156
402	4520	ILMN_1689932	C9orf112	0.156
403	4732	ILMN_1691731	PARP14	0.156
404	3098	ILMN_1677497	STAB2	0.156
405	22992	ILMN_2361181	C1QTNF6	0.156
406	13072	ILMN_1770663	KRT24	0.156
407	14803	ILMN_1788387	UGCGL2	0.156
408	3969	ILMN_1684982	PDK4	0.156
409	4394	ILMN_1688698	ZFHX1B	0.156
410	23494	ILMN_2380494	ANXA11	0.156
411	19451	ILMN_2151114	VSNL1	0.156
412	23289	ILMN_2372199	C6orf1	0.156
413	8146	ILMN_1723035	OLR1	0.156
414	9433	ILMN_1735502	MGC33846	0.156
415	3929	ILMN_1684591	ZNF434	0.156
416	23143	ILMN_2366795	KIF27	0.156
417	1087	ILMN_1659990	HIG2	0.155
418	15594	ILMN_1796417	ASNS	0.155
419	9297	ILMN_1733998	DHRS9	0.156
420	5522	ILMN_1698934	CMTM7	0.155
421	9793	ILMN_1738712	ITR	0.155
422	12393	ILMN_1764096	CCBL1	0.155
423	12336	ILMN_1763587	TNMD	0.155
424	22319	ILMN_2329569	C9orf116	0.155
425	11707	ILMN_1757370	SMPD1	0.155
426	21914	ILMN_2302654	LRP8	0.155
427	6792	ILMN_1710523	ATP8B1	0.155
428	3886	ILMN_1684271	ACBD6	0.155
429	4304	ILMN_1687922	RP9	0.154
430	24429	ILMN_2412922	C14orf43	0.154
431	15855	ILMN_1798841	PLCXD3	0.154
432	20584	ILMN_2215545	C3orf26	0.154
433	13836	ILMN_1778319	ZD52F10	0.154
434	6585	ILMN_1708486	CNN2	0.154
435	15109	ILMN_1791508	MMP28	0.154
436	12341	ILMN_1763612	KIAA1944	0.153
437	3075	ILMN_1677305	PVR	0.154
438	10137	ILMN_1741684	SMPD1	0.154
439	5127	ILMN_1695317	RCBTB1	0.154
440	533	ILMN_1655642	KIAA1794	0.153
441	13117	ILMN_1771026	GARS	0.153
442	18005	ILMN_2065690	GRAMD3	0.154
443	8506	ILMN_1726575	CHODL	0.154
444	3904	ILMN_1684391	PLOD1	0.153
445	12410	ILMN_1764309	ADH1A	0.153
446	5575	ILMN_1699570	TPD52L2	0.153
447	3900	ILMN_1684357	C14orf139	0.153
448	12028	ILMN_1760688	SAMD14	0.153
449	23963	ILMN_2396982	BCL2L12	0.153
450	464	ILMN_1655117	WDR19	0.153
451	6749	ILMN_1710052	CPT1A	0.153
452	11229	ILMN_1752668	DAAM2	0.153
453	11444	ILMN_1754753	IL6R	0.153
454	6008	ILMN_1703205	EDN3	0.153
455	19462	ILMN_2151541	DNAJC10	0.153
456	11993	ILMN_1760332	PIGL	0.153
457	4609	ILMN_1690682	B3GALT4	0.153
458	17447	ILMN_1814296	TRPM6	0.153
459	23462	ILMN_2379130	IRAK1	0.153
460	21111	ILMN_2251375	ZFP64	0.153
461	9842	ILMN_1739161	PPAP2A	0.153
462	2035	ILMN_1668345	OAF	0.153
463	3010	ILMN_1676709	SDK2	0.152
464	18010	ILMN_2066020	TCEB1	0.152
465	20174	ILMN_2193214	MPND	0.152
466	3022	ILMN_1676822	ECRG4	0.152
467	18218	ILMN_2078592	C6orf105	0.152
468	15514	ILMN_1795678	POLR3C	0.152
469	1152	ILMN_1660552	BMP5	0.152
470	3799	ILMN_1683562	SNRPG	0.152
471	7549	ILMN_1717381	HOXD1	0.152
472	24035	ILMN_2399523	JAG2	0.152
473	4029	ILMN_1685467	ZNF397	0.152
474	1095	ILMN_1660086	MYH11	0.152
475	18183	ILMN_2076429	GALNT17	0.152
476	3134	ILMN_1677794	BRCA2	0.152
477	6907	ILMN_1711566	TIMP1	0.152
478	23347	ILMN_2374352	DBNDD1	0.152
479	6493	ILMN_1707695	IFIT1	0.152
480	11267	ILMN_1753016	MRPL35	0.151
481	4445	ILMN_1689111	CXCL12	0.151
482	17008	ILMN_1810235	ATP6V1E2	0.151
483	12228	ILMN_1762594	CARD15	0.151
484	22299	ILMN_2328378	OSBPL3	0.151
485	19952	ILMN_2180885	FLJ21511	0.151
486	14913	ILMN_1789492	ZDHHC8	0.151
487	565	ILMN_1655915	MMP11	0.151
488	3035	ILMN_1676946	AP3M2	0.151
489	19763	ILMN_2170515	C9orf32	0.151
490	13985	ILMN_1779711	DTL	0.151
491	2206	ILMN_1669696	FLJ38451	0.151
492	10022	ILMN_1740706	PMP2	0.151
493	23406	ILMN_2376723	CDKN2B	0.151
494	4227	ILMN_1687315	RXRA	0.151
495	607	ILMN_1656196	E2F6	0.151
496	17953	ILMN_2061537	UGT1A8	0.151
497	10084	ILMN_1741200	RFX5	0.151
498	18108	ILMN_2071826	RNF152	0.15
499	21513	ILMN_2279961	LAMP2	0.15
500	22487	ILMN_2338323	CDC25B	0.15
501	2332	ILMN_1670723	MSL3L1	0.15
502	13031	ILMN_1770290	CNN2	0.15
503	7017	ILMN_1712545	S100A3	0.15
504	16905	ILMN_1809292	IMMP2L	0.15
505	13943	ILMN_1779370	ARHGEF9	0.15
506	19368	ILMN_2147114	PSPH	0.15
507	5774	ILMN_1701403	HIP1	0.15
508	22939	ILMN_2358886	EDN3	0.15
509	13673	ILMN_1776653	SCML1	0.15
510	21671	ILMN_2289093	KIAA1618	0.15
511	5909	ILMN_1702487	SGK	0.15
512	12774	ILMN_1768016	TNFRSF17	0.15
513	5823	ILMN_1701827	IGSF4B	0.15
514	20930	ILMN_2234873	NME2	0.15
515	17786	ILMN_2052331	MYOC	0.149
516	16922	ILMN_1809456	CNTFR	0.149
517	13617	ILMN_1776088	NAT9	0.149
518	13329	ILMN_1773125	ENTPD1	0.149
519	24146	ILMN_2403247	CMTM7	0.149
520	4180	ILMN_1686906	TP53INP2	0.149
521	9280	ILMN_1733874	SH2D2A	0.149
522	16910	ILMN_1809323	C9orf125	0.149
523	10228	ILMN_1742577	GTPBP4	0.149
524	6023	ILMN_1703330	FEM1C	0.149
525	5633	ILMN_1700024	UST	0.149
526	21540	ILMN_2281502	DHRS9	0.149
527	3456	ILMN_1680424	CTSG	0.149
528	5864	ILMN_1702171	AYTL2	0.149
529	6299	ILMN_1705848	CXorf44	0.149
530	18623	ILMN_2103107	ADAMDEC1	0.149
531	11026	ILMN_1750790	GSTM5	0.148
532	18948	ILMN_2121979	UGT2A3	0.148
533	12577	ILMN_1765858	CAB39	0.148
534	1112	ILMN_1660232	PEX5	0.148
535	14587	ILMN_1786108	RBM21	0.148
536	4554	ILMN_1690209	C1orf186	0.148
537	13488	ILMN_1774836	PLOD3	0.148
538	585	ILMN_1656057	PLAU	0.148
539	21394	ILMN_2273103	ELK4	0.148
540	7983	ILMN_1721580	TBX15	0.148
541	19026	ILMN_2126239	SMG5	0.148
542	7481	ILMN_1716803	LOC138046	0.148
543	10165	ILMN_1742003	RHPN1	0.148
544	18358	ILMN_2087989	ZFAND1	0.148
545	22846	ILMN_2355168	MGST1	0.148
546	9860	ILMN_1739275	HTR3C	0.148
547	4504	ILMN_1689720	PPP2R3B	0.147
548	12887	ILMN_1769013	ASGR1	0.147
549	19184	ILMN_2135175	SNORD36A	0.147
550	11182	ILMN_1752214	UGT2B17	0.147
551	12693	ILMN_1767129	ABCC8	0.147
552	5717	ILMN_1700811	UBPH	0.147
553	11770	ILMN_1758034	ETFDH	0.147
554	21909	ILMN_2302075	MSI2	0.147
555	15690	ILMN_1797310	ATP6V1D	0.147
556	15539	ILMN_1795918	CENTG3	0.147
557	7351	ILMN_1715662	URB	0.147
558	6750	ILMN_1710064	RDHE2	0.147
559	1455	ILMN_1663099	UBE2B	0.147
560	15883	ILMN_1799099	TEKT3	0.146
561	23961	ILMN_2396948	PSMC3IP	0.146
562	2761	ILMN_1674609	CLTB	0.146
563	2529	ILMN_1672486	TCF7L2	0.146
564	5202	ILMN_1695962	SLC12A9	0.146
565	22650	ILMN_2345908	DDX11	0.146
566	4995	ILMN_1694106	GPD1L	0.146
567	16515	ILMN_1805481	C6orf75	0.146
568	3459	ILMN_1680453	ITM2C	0.146
569	7081	ILMN_1713088	MSI2	0.146
570	3222	ILMN_1678579	CPT2	0.146
571	20019	ILMN_2184556	SLC4A4	0.146
572	5550	ILMN_1699265	TNFRSF10B	0.146
573	19003	ILMN_2124802	MT1H	0.146
574	14997	ILMN_1790508	KCNA5	0.146
575	10561	ILMN_1745964	IRAK2	0.146
576	4787	ILMN_1692223	LCN2	0.146
577	7393	ILMN_1715994	HGS	0.145
578	4191	ILMN_1686985	MTM1	0.146
579	3326	ILMN_1679405	DDX56	0.146
580	3070	ILMN_1677261	LZTS1	0.145
581	4730	ILMN_1691717	RHBDF2	0.145
582	22588	ILMN_2342835	P2RY14	0.145
583	9890	ILMN_1739586	FEZ2	0.145
584	14437	ILMN_1784540	KBTBD2	0.145
585	16215	ILMN_1802458	AGTRAP	0.145
586	10593	ILMN_1746317	NUPL1	0.145
587	15595	ILMN_1796423	CLIC3	0.145
588	15104	ILMN_1791447	CXCL12	0.145
589	10351	ILMN_1743770	SLC25A14	0.145
590	9134	ILMN_1732398	SCGB2A1	0.145
591	2649	ILMN_1673639	ABI3BP	0.145
592	2610	ILMN_1673352	IFITM2	0.145
593	24052	ILMN_2400219	SRI	0.145
594	3499	ILMN_1680874	TUBB2B	0.145
595	6631	ILMN_1708950	ASPHD1	0.145
596	4806	ILMN_1692394	KIAA1024	0.145
597	9598	ILMN_1737076	HHLA2	0.145
598	18830	ILMN_2115350	TNXA	0.145
599	10428	ILMN_1744676	ZNF179	0.145
600	22758	ILMN_2351466	HNT	0.145
601	4923	ILMN_1693494	CMTM1	0.145
602	4677	ILMN_1691291	PIGS	0.145
603	21650	ILMN_2287941	CYLD	0.144
604	23817	ILMN_2391512	ASAHL	0.145
605	10961	ILMN_1750088	VRK2	0.144
606	12486	ILMN_1765043	RPL38	0.144
607	24306	ILMN_2408683	PPAP2B	0.144
608	6645	ILMN_1709039	RPL13	0.144
609	16814	ILMN_1808404	RHBDF1	0.144
610	2551	ILMN_1672660	MBP	0.144
611	12718	ILMN_1767362	ADAMTS6	0.144
612	23219	ILMN_2369580	C16orf35	0.144
613	6990	ILMN_1712389	CKLF	0.144
614	11703	ILMN_1757347	C22orf9	0.144
615	4234	ILMN_1687359	MRPS23	0.144
616	14742	ILMN_1787843	HSDL2	0.144
617	19074	ILMN_2129161	LRRC32	0.144
618	9076	ILMN_1731720	PDRG1	0.144
619	6246	ILMN_1705397	PDK2	0.144
620	21331	ILMN_2268068	MAPKAP1	0.144
621	23082	ILMN_2364414	PCDHA6	0.144
622	3074	ILMN_1677292	LOC90355	0.144
623	14494	ILMN_1785161	CHCHD6	0.144
624	5842	ILMN_1701940	FAM73B	0.144
625	13341	ILMN_1773278	OR8D4	0.144
626	17727	ILMN_2048700	ATAD2	0.143
627	19319	ILMN_2143795	MGC4677	0.143
628	5359	ILMN_1697412	RHBG	0.143
629	22813	ILMN_2353633	EMR2	0.143
630	22903	ILMN_2357542	VIP	0.143
631	11985	ILMN_1760280	NXT1	0.143
632	9995	ILMN_1740487	CMTM7	0.143
633	8360	ILMN_1725130	FAM50A	0.143
634	10678	ILMN_1747197	SLC41A2	0.143
635	21603	ILMN_2285375	SORD	0.143
636	17481	ILMN_1814770	CPNE4	0.143
637	9609	ILMN_1737157	GRAMD1A	0.143
638	1716	ILMN_1665435	GPR30	0.143
639	13484	ILMN_1774806	SLC9A7	0.143
640	2179	ILMN_1669502	E2F3	0.143
641	2431	ILMN_1671482	GALM	0.143
642	17248	ILMN_1812392	TMSB10	0.143
643	7025	ILMN_1712613	PNLIPRP2	0.143
644	20926	ILMN_2234697	BEX1	0.143
645	15010	ILMN_1790625	CBX3	0.143
646	11875	ILMN_1759075	TNFRSF13B	0.143
647	5251	ILMN_1696316	CPT1A	0.143
648	1110	ILMN_1660222	MTBP	0.143
649	8497	ILMN_1726512	ZSCAN2	0.142
650	23599	ILMN_2383871	ZNF74	0.142
651	14712	ILMN_1787511	THUMPD2	0.142
652	10546	ILMN_1745849	ENTPD5	0.142
653	13542	ILMN_1775348	KCNH8	0.142
654	1962	ILMN_1667592	PARVB	0.142
655	12943	ILMN_1769520	UBE2L6	0.142
656	23980	ILMN_2397627	UPF3B	0.142
657	7870	ILMN_1720461	SLC17A4	0.142
658	2350	ILMN_1670841	CPNE1	0.142
659	12903	ILMN_1769140	KIAA1958	0.142
660	8764	ILMN_1728802	SDCCAG8	0.142
661	21480	ILMN_2278335	LOC441282	0.142
662	3100	ILMN_1677509	PRR7	0.142
663	618	ILMN_1656300	GFRA2	0.142
664	6693	ILMN_1709486	SRPX	0.141
665	2520	ILMN_1672393	CUL7	0.141
666	14146	ILMN_1781454	RAE1	0.141
667	7426	ILMN_1716300	CDH7	0.141
668	9997	ILMN_1740493	TRAF5	0.141
669	18886	ILMN_2118201	SPAG11A	0.141
670	22002	ILMN_2310909	ATP2A3	0.141
671	6548	ILMN_1708151	DXS9879E	0.141
672	2955	ILMN_1676296	PPAP2A	0.141
673	9231	ILMN_1733523	NARG1L	0.141
674	1653	ILMN_1664855	PPP1R14C	0.141
675	12769	ILMN_1767894	POLB	0.141
676	19950	ILMN_2180848	COCH	0.141
677	5762	ILMN_1701308	COL1A1	0.141
678	15852	ILMN_1798819	DTNB	0.141
679	23729	ILMN_2388547	EPSTI1	0.141
680	15470	ILMN_1795257	GPT	0.141
681	8958	ILMN_1730729	C1orf75	0.14
682	21956	ILMN_2307025	CPNE1	0.14
683	12012	ILMN_1760506	LOC158160	0.14
684	17366	ILMN_1813561	SCIN	0.14
685	7746	ILMN_1719194	IBSP	0.14
686	19677	ILMN_2165354	DCAMKL1	0.14
687	4444	ILMN_1689110	NOB1P	0.14
688	19712	ILMN_2167729	LOC346157	0.14
689	7675	ILMN_1718610	ARHGAP17	0.14
690	160	ILMN_1652378	IPO7	0.14
691	8302	ILMN_1724497	ABI2	0.14
692	24270	ILMN_2407482	ITPA	0.14
693	16280	ILMN_1803194	GALK1	0.14
694	20103	ILMN_2189406	C15orf38	0.14
695	16036	ILMN_1800750	ZNF692	0.14
696	2469	ILMN_1671891	FLJ20701	0.14
697	10612	ILMN_1746517	KYNU	0.14
698	5962	ILMN_1702858	ADHFE1	0.14
699	6057	ILMN_1703648	LOC388595	0.14
700	23704	ILMN_2387952	FLJ20152	0.14
701	9877	ILMN_1739441	GANAB	0.14
702	17467	ILMN_1814629	ZC3H12B	0.14
703	12636	ILMN_1766408	CBFB	0.14
704	18632	ILMN_2103591	MORC2	0.139
705	16963	ILMN_1809866	WDR74	0.139
706	23941	ILMN_2396272	PDCD4	0.139
707	18411	ILMN_2091375	KRCC1	0.139
708	9018	ILMN_1731206	NKD2	0.139
709	19477	ILMN_2152429	FLJ40142	0.139
710	7568	ILMN_1717636	RGMA	0.139
711	20692	ILMN_2222880	SLC25A42	0.139
712	8004	ILMN_1721732	MLZE	0.139
713	11977	ILMN_1760201	DNMT1	0.139
714	19165	ILMN_2133996	SHE	0.139
715	24407	ILMN_2412214	LGALS9	0.139
716	16278	ILMN_1803180	PRDX6	0.139
717	16250	ILMN_1802804	L3MBTL	0.139
718	20635	ILMN_2218935	GPR37	0.139
719	18992	ILMN_2124352	DCUN1D5	0.139
720	1280	ILMN_1661577	MAFA	0.139
721	22888	ILMN_2357062	IL1RAP	0.139
722	13403	ILMN_1773963	GNA15	0.139
723	11138	ILMN_1751789	HNMT	0.139
724	19557	ILMN_2157510	BLOC1S1	0.139
725	16539	ILMN_1805750	IFITM3	0.139
726	22531	ILMN_2340347	PC	0.139
727	13955	ILMN_1779416	SCUBE2	0.139
728	15610	ILMN_1796589	TRIP13	0.138
729	792	ILMN_1657708	MGLL	0.138
730	17187	ILMN_1811754	NDUFB10	0.138
731	17420	ILMN_1813957	CEACAM7	0.138
732	21963	ILMN_2307656	AGTRAP	0.138
733	3324	ILMN_1679391	MAMDC2	0.138
734	5263	ILMN_1696434	LAMA1	0.138
735	23120	ILMN_2366041	ITM2C	0.138
736	23790	ILMN_2390609	ANK3	0.138
737	12768	ILMN_1767892	DUSP12	0.138
738	6477	ILMN_1707484	GEMIN6	0.138
739	18827	ILMN_2115218	ANKRD10	0.138
740	20548	ILMN_2213297	C11orf54	0.138
741	17748	ILMN_2049766	NFE2L3	0.138
742	7228	ILMN_1714511	PARK2	0.138
743	691	ILMN_1656902	HECTD3	0.138
744	15153	ILMN_1791884	LOC128439	0.138
745	7433	ILMN_1716370	TNS4	0.138
746	2728	ILMN_1674337	FKBP2	0.138
747	22826	ILMN_2354237	PARP2	0.138
748	16708	ILMN_1807277	IFI30	0.137
749	20753	ILMN_2225709	PTCD1	0.138
750	4649	ILMN_1691048	SLC22A18AS	0.138
751	11913	ILMN_1759495	XPO5	0.138
752	5193	ILMN_1695900	TNFSF11	0.138
753	16687	ILMN_1807074	MIF	0.137
754	402	ILMN_1654541	ATP6V1G2	0.137
755	15868	ILMN_1798971	FZD5	0.137
756	512	ILMN_1655521	DMRTA1	0.137
757	10663	ILMN_1747058	HSPC176	0.137
758	8831	ILMN_1729482	KLK15	0.137
759	24258	ILMN_2406892	C19orf2	0.137
760	13427	ILMN_1774229	SLC7A4	0.137
761	883	ILMN_1658356	DKFZP586H2123	0.137
762	12276	ILMN_1763091	C14orf43	0.137
763	13068	ILMN_1770629	SLC17A7	0.137
764	2498	ILMN_1672148	AKR1B10	0.137
765	11129	ILMN_1751645	OR3A4	0.137
766	17817	ILMN_2053679	ACADM	0.137
767	15762	ILMN_1797933	MRPL17	0.137
768	2719	ILMN_1674231	CHAF1B	0.137
769	24526	ILMN_2416019	ENTPD8	0.137
770	14848	ILMN_1788886	TOX	0.137
771	1136	ILMN_1660413	SGK2	0.136
772	14199	ILMN_1781996	NUDT16	0.136
773	13140	ILMN_1771223	PADI2	0.136
774	3628	ILMN_1682100	IGSF10	0.136
775	3648	ILMN_1682232	MIER1	0.136
776	2671	ILMN_1673798	PPOX	0.136
777	2998	ILMN_1676625	SS18L1	0.136
778	15291	ILMN_1793410	SNTB1	0.136
779	19521	ILMN_2155172	BXDC2	0.136
780	3702	ILMN_1682775	EDN1	0.136
781	6654	ILMN_1709094	LIFR	0.136
782	9185	ILMN_1733042	BCAS1	0.136
783	16028	ILMN_1800659	PGM1	0.136
784	11475	ILMN_1755051	EFHC1	0.136
785	4040	ILMN_1685567	TGDS	0.136
786	18968	ILMN_2123312	LRAP	0.136
787	21885	ILMN_2299450	P2RX2	0.136
788	2299	ILMN_1670506	AMMECR1	0.136
789	24481	ILMN_2414762	TLR10	0.136
790	17662	ILMN_2044617	MTERFD1	0.136
791	20297	ILMN_2199439	CA2	0.136
792	4226	ILMN_1687306	LGALS2	0.136
793	23140	ILMN_2366714	UCRC	0.136
794	22811	ILMN_2353431	ANKRD16	0.136
795	11139	ILMN_1751793	PCNXL2	0.136
796	22804	ILMN_2353143	FBLIM1	0.136
797	15208	ILMN_1792409	AMOT	0.135
798	13649	ILMN_1776363	ANK2	0.136
799	4166	ILMN_1686748	TMEM9	0.136
800	20719	ILMN_2224143	MCM3	0.135
801	24496	ILMN_2415235	CSNK1E	0.135
802	17946	ILMN_2061310	SUHW3	0.135
803	1306	ILMN_1661776	CENPJ	0.135
804	4973	ILMN_1693941	IGSF9	0.135
805	5463	ILMN_1698259	TMEM100	0.135
806	6616	ILMN_1708858	CSNK1E	0.135
807	4858	ILMN_1692938	PSAT1	0.135
808	23951	ILMN_2396648	EXOSC1	0.135
809	11595	ILMN_1756360	RPL35A	0.135
810	8986	ILMN_1730945	C19orf4	0.135
811	4155	ILMN_1686610	APBA3	0.134
812	17854	ILMN_2055330	KIF26B	0.134
813	14455	ILMN_1784706	GABRE	0.135
814	21194	ILMN_2257607	STARD13	0.135
815	6233	ILMN_1705301	TEAD4	0.135
816	21874	ILMN_2298860	HAGHL	0.135
817	21949	ILMN_2306540	PDE9A	0.135
818	24512	ILMN_2415583	HS6ST2	0.134
819	13827	ILMN_1778242	CALM1	0.134
820	23137	ILMN_2366654	NR5A2	0.135
821	9591	ILMN_1737005	FLJ12886	0.134
822	17030	ILMN_1810441	TRIM3	0.134
823	18813	ILMN_2114568	GBP5	0.134
824	7521	ILMN_1717163	F13A1	0.134
825	8214	ILMN_1723768	NOD9	0.134
826	7008	ILMN_1712505	KDELC1	0.134
827	23746	ILMN_2389151	UGP2	0.134
828	3358	ILMN_1679694	MMP27	0.134
829	22210	ILMN_2323491	NUP62	0.134
830	11077	ILMN_1751228	C20orf46	0.134
831	4662	ILMN_1691156	MT1A	0.134
832	4966	ILMN_1693891	MOGAT2	0.134
833	7881	ILMN_1720526	C16orf60	0.134
834	6571	ILMN_1708348	ADAM8	0.134
835	11943	ILMN_1759910	SERPINA5	0.134
836	4280	ILMN_1687751	BAALC	0.134
837	5659	ILMN_1700310	SDCBP2	0.134
838	13396	ILMN_1773906	NCOA4	0.134
839	22359	ILMN_2331163	CUL4A	0.134
840	3258	ILMN_1678841	UBD	0.134
841	2185	ILMN_1669550	MAD2L2	0.134
842	5498	ILMN_1698653	ODF2	0.134
843	11358	ILMN_1753885	YTHDF1	0.134
844	11885	ILMN_1759175	DUSP10	0.134
845	9507	ILMN_1736234	C1orf77	0.134
846	270	ILMN_1653319	MC1R	0.134
847	3879	ILMN_1684210	NPAL3	0.134
848	23235	ILMN_2370241	TEX11	0.134
849	8801	ILMN_1729180	GATM	0.134
850	4927	ILMN_1693538	STK36	0.134
851	21334	ILMN_2268241	ABL1	0.134
852	16463	ILMN_1804929	OXTR	0.134
853	2534	ILMN_1672536	FBLN1	0.134
854	11814	ILMN_1758457	TBC1D16	0.134
855	20266	ILMN_2197946	SCG3	0.134
856	2888	ILMN_1675695	APRIN	0.133
857	14200	ILMN_1781999	ABCF2	0.133
858	1783	ILMN_1666004	WASL	0.133
859	16689	ILMN_1807095	MRPS36	0.133
860	4414	ILMN_1688853	ZBTB9	0.133
861	16841	ILMN_1808707	FSCN1	0.133
862	7880	ILMN_1720513	SETBP1	0.133
863	16163	ILMN_1801934	SERTAD3	0.133
864	1402	ILMN_1662686	USPL1	0.133
865	19631	ILMN_2162253	NMU	0.133
866	9828	ILMN_1739001	TACSTD2	0.133
867	13532	ILMN_1775268	HECW2	0.133
868	22772	ILMN_2352077	KL	0.133
869	18241	ILMN_2080080	MAP7D2	0.133
870	16087	ILMN_1801246	IFITM1	0.133
871	244	ILMN_1653115	ECH1	0.133
872	22287	ILMN_2327795	RERE	0.133
873	17089	ILMN_1810992	CAD	0.133
874	19287	ILMN_2141455	ZNF781	0.133
875	22805	ILMN_2353161	MSLN	0.133
876	20543	ILMN_2212999	KIF5C	0.133
877	12344	ILMN_1763638	BCAR3	0.133
878	8730	ILMN_1728517	FNTB	0.133
879	1922	ILMN_1667199	SQRDL	0.133
880	15459	ILMN_1795166	PTHR1	0.133
881	1925	ILMN_1667224	SLAMF8	0.133
882	5686	ILMN_1700541	FBLN1	0.133
883	13280	ILMN_1772713	BMS1L	0.132
884	2643	ILMN_1673586	SLC6A6	0.132
885	2779	ILMN_1674706	MTHFD2	0.132
886	17240	ILMN_1812302	FAM82A	0.132
887	5484	ILMN_1698487	SDHD	0.132
888	19024	ILMN_2126038	STMN2	0.132
889	10869	ILMN_1749114	OTC	0.132
890	7711	ILMN_1718907	SDCCAG33	0.132
891	4884	ILMN_1693210	C8orf36	0.132
892	6001	ILMN_1703153	N-PAC	0.132
893	24232	ILMN_2406106	CACNB2	0.132
894	23382	ILMN_2376108	PSMB9	0.132
895	19779	ILMN_2171481	FAM55A	0.132
896	16153	ILMN_1801869	WDR75	0.132
897	10026	ILMN_1740737	DCPS	0.132
898	13677	ILMN_1776724	MGC52057	0.132
899	16094	ILMN_1801341	DNHD2	0.132
900	3212	ILMN_1678493	CHN1	0.132
901	687	ILMN_1656840	VPS13D	0.132
902	17758	ILMN_2050617	CCT6AP1	0.131
903	16614	ILMN_1806407	SEMA6D	0.131
904	21506	ILMN_2279484	MGC13057	0.131
905	5927	ILMN_1702633	RetSat	0.131
906	22146	ILMN_2320330	MAL	0.131
907	936	ILMN_1658800	BRPF3	0.131
908	16026	ILMN_1800642	RELN	0.131
909	18748	ILMN_2110561	IFNA8	0.131
910	14933	ILMN_1789641	ABCG2	0.131
911	2058	ILMN_1668540	C1orf181	0.131
912	11287	ILMN_1753183	CDCA4	0.131
913	16283	ILMN_1803213	MXRA5	0.131
914	4229	ILMN_1687319	SLCO1B3	0.131
915	23564	ILMN_2382906	PLCG1	0.131
916	17807	ILMN_2053345	KCNT2	0.131
917	8211	ILMN_1723709	C9orf116	0.131
918	3750	ILMN_1683121	CYP2C18	0.131
919	14294	ILMN_1783075	C6orf167	0.131
920	23373	ILMN_2375651	SCNM1	0.131
921	3354	ILMN_1679685	LOC650040	0.131
922	10607	ILMN_1746465	FJX1	0.131
923	20148	ILMN_2191720	ZNF471	0.131
924	20042	ILMN_2185884	DHRS4	0.131
925	4501	ILMN_1689704	TMEM5	0.131
926	18576	ILMN_2100357	SMPDL3A	0.131
927	4811	ILMN_1692433	RECQL5	0.131
928	1596	ILMN_1664362	SGIP1	0.131
929	18848	ILMN_2115974	GSDM1	0.131
930	5260	ILMN_1696394	IL6R	0.13
931	6169	ILMN_1704665	GPM6B	0.13
932	16114	ILMN_1801491	SLC26A2	0.13
933	2691	ILMN_1673966	POLR3F	0.13
934	11896	ILMN_1759312	AMPD1	0.13
935	5603	ILMN_1699728	BTD	0.13
936	13194	ILMN_1771852	ZNF575	0.13
937	9594	ILMN_1737025	PLCL2	0.13
938	11017	ILMN_1750689	MPP5	0.13
939	11071	ILMN_1751161	COL7A1	0.13
940	5118	ILMN_1695226	DIAPH3	0.13
941	15219	ILMN_1792506	PLA1A	0.13
942	17349	ILMN_1813374	C19orf28	0.13
943	1099	ILMN_1660114	MMRN1	0.13
944	7285	ILMN_1715068	AQP9	0.13
945	5677	ILMN_1700448	SIM2	0.13
946	13689	ILMN_1776905	LOC340843	0.13
947	19841	ILMN_2174805	CD300LG	0.13
948	7541	ILMN_1717313	NFKBIE	0.13
949	1468	ILMN_1663171	MATN3	0.13
950	9522	ILMN_1736441	PDXP	0.13
951	15541	ILMN_1795930	PTGER4	0.13
952	19317	ILMN_2143671	KPTN	0.13
953	3691	ILMN_1682694	LOC203547	0.13
954	14635	ILMN_1786601	PLAGL2	0.13
955	8520	ILMN_1726666	GPX3	0.13
956	11804	ILMN_1758339	CSTF1	0.13
957	16336	ILMN_1803686	ADA	0.13
958	10297	ILMN_1743232	MICALCL	0.13
959	20227	ILMN_2195703	PPARGC1B	0.13
960	5254	ILMN_1696339	ZIC2	0.13
961	3708	ILMN_1682812	C21orf33	0.13
962	1318	ILMN_1661875	ANK3	0.13
963	16666	ILMN_1806867	PPM1G	0.13
964	4864	ILMN_1693009	FGL2	0.13
965	24455	ILMN_2413644	TM4SF19	0.129
966	6003	ILMN_1703178	SCG2	0.129
967	16207	ILMN_1802404	ABCC1	0.129
968	12585	ILMN_1765966	CHGB	0.129
969	6139	ILMN_1704376	GLDN	0.129
970	8780	ILMN_1728983	NR2C1	0.129
971	8130	ILMN_1722869	PDZD3	0.129
972	16135	ILMN_1801703	CPLX1	0.129
973	4542	ILMN_1690121	P4HA3	0.129
974	13545	ILMN_1775373	CMTM5	0.129
975	14027	ILMN_1780255	KLK6	0.129
976	3933	ILMN_1684628	ZFP90	0.129
977	12712	ILMN_1767324	EIF4EBP1	0.129
978	13981	ILMN_1779674	PTPRG	0.129
979	26	ILMN_1651354	SPP1	0.129
980	8585	ILMN_1727200	SLCO4A1	0.129
981	20088	ILMN_2188521	PVRL3	0.129
982	18922	ILMN_2120507	FLJ16331	0.129
983	10563	ILMN_1745988	NUDT12	0.129
984	23268	ILMN_2371280	CSF3R	0.129
985	840	ILMN_1658040	CRABP1	0.129
986	22687	ILMN_2347798	IFI6	0.129
987	15490	ILMN_1795419	C2orf24	0.129
988	8708	ILMN_1728298	SBK1	0.128
989	13676	ILMN_1776723	PHF11	0.129
990	23	ILMN_1651343	ITGA11	0.129
991	4236	ILMN_1687375	ATP2A2	0.129
992	4838	ILMN_1692731	TTYH3	0.128
993	13941	ILMN_1779353	PUS7	0.128
994	15615	ILMN_1796629	EDNRA	0.128
995	20790	ILMN_2227495	ZNF549	0.128
996	16743	ILMN_1807689	PKNOX2	0.128
997	14021	ILMN_1780172	C20orf195	0.128
998	7662	ILMN_1718449	NSUN5C	0.128
999	419	ILMN_1654671	LOC653705	0.128
1000	14161	ILMN_1781626	C1S	0.128
